# Supplementary material for: A Rainbow Reporter Tracks Single Cells and Reveals Heterogeneous Cellular Dynamics among Pluripotent Stem Cells and Their Differentiated Derivatives
Source: PubMed Central journal article supplement — Stem Cell Reports. 2020 Jul 2;15(1):226–41. doi: 10.1016/j.stemcr.2020.06.005 (PMC7363961; doi:10.1016/j.stemcr.2020.06.005), 2020-07-02
Supplement: mmc11.pdf [file mmc11.pdf]

## A Rainbow Reporter Tracks Single Cells and Reveals Heterogeneous Cellular Dynamics among Pluripotent Stem Cells and Their Differentiated Derivatives

Danny El-Nachef,<sup>1,2,6</sup> Kevin Shi,<sup>1</sup> Kevin M. Beussman,<sup>2,3,4,6</sup> Refugio Martinez,<sup>1,2</sup> Mary C. Regier,<sup>2,3,6</sup> Guy W. Everett,<sup>2,3,6</sup> Charles E. Murry,<sup>1,2,3,5,6</sup> Kelly R. Stevens,<sup>1,2,3,6</sup> Jessica E. Young,<sup>1,2</sup> Nathan J. Sniadecki,<sup>2,3,4,6</sup> and Jennifer Davis<sup>1,2,3,6,7,\*</sup>

<sup>1</sup>Department of Pathology, University of Washington, Seattle, WA 98109, USA

<sup>2</sup>The Institute for Stem Cell and Regenerative Medicine, University of Washington, Seattle, WA 98109, USA

<sup>3</sup>Department of Bioengineering, University of Washington, Seattle, WA 98105, USA

<sup>4</sup>Department of Mechanical Engineering, University of Washington, Seattle, WA 98195, USA

<sup>5</sup>Department of Medicine, Cardiology, University of Washington, Seattle, WA 98195, USA

<sup>6</sup>Center for Cardiovascular Biology, University of Washington, Seattle, WA 98109, USA

<sup>7</sup>Lead Contact

\*Correspondence: [jendavis@uw.edu](mailto:jendavis@uw.edu)

<https://doi.org/10.1016/j.stemcr.2020.06.005>

### SUMMARY

Single-cell transcriptomic approaches have found molecular heterogeneities within populations of pluripotent stem cells (PSCs). A tool that tracks single-cell lineages and their phenotypes longitudinally would reveal whether heterogeneity extends beyond molecular identity. Hence, we generated a stable Cre-inducible rainbow reporter human PSC line that provides up to 18 unique membrane-targeted fluorescent barcodes. These barcodes enable repeated assessments of single cells as they clonally expand, change morphology, and migrate. Owing to the cellular resolution of this reporter, we identified subsets of PSCs with enhanced clonal expansion, synchronized cell divisions, and persistent localization to colony edges. Reporter expression was stably maintained throughout directed differentiation into cardiac myocytes, cortical neurons, and hepatoblasts. Repeated examination of neural differentiation revealed self-assembled cortical tissues derive from clonally dominant progenitors. Collectively, these findings demonstrate the broad utility and easy implementation of this reporter line for tracking single-cell behavior.

### INTRODUCTION

Single-cell RNA sequencing studies have recently demonstrated that individual PSCs within a culture express a wide range of transcriptional profiles despite uniformly expressing the same cell-type-specific markers, such as Oct4 and Tra1 (Kumar et al., 2017; Nakanishi et al., 2019). It has been challenging to determine whether this translates to functional heterogeneity among PSCs. Most assessments of PSCs and their differentiated progeny are unable to track dynamic behaviors at the single-cell level, presenting a technical limitation for the field. For instance, cell proliferation and morphology are typically quantified by staining for cell-cycle or membrane markers in fixed specimens, which prevents repeated assessment of individual cells over time (Andäng et al., 2008; Kocsisova et al., 2018). In addition, markers used for proliferation studies are not definitive indices of newly generated cells (van Berlo and Molkentin, 2014). For example, PSC-derived cardiac myocytes and hepatocytes can undergo DNA synthesis and nuclear division without completing cell division (Hannan et al., 2013; Lundy et al., 2013). Live-cell markers, such as GFP fusion proteins with cell-cycle or membrane markers, have been used to overcome this limitation (Gantz et al., 2012; Pauklin and Vallier, 2013), but this approach is still hampered by the inability to resolve the parental identity

of cell progeny or distinguish differences in clonal expansion since the cells are uniformly labeled with the same color. Likewise, studies of PSCs and PSC colony migration are challenging due to difficulty in following them over long periods of time in the absence of live-cell barcodes (Kusuma and Gerecht, 2013; Megyola et al., 2013; Zangle et al., 2013). Since PSCs have emerged as important tools to regenerate tissue, model human development and disease, and for drug screening (Inoue et al., 2014; Rowe and Daley, 2019), realizing the dynamic behaviors of PSCs on a per cell basis could improve our understanding of human biology and medicine.

Recently, rainbow mouse models have enabled tracking of single-cell lineages (Livet et al., 2007; Snippert et al., 2010). In these models, Cre recombinase (Cre) treatment induces the expression of a combination of fluorescent proteins, which in turn barcodes cell lineages with a broad palette of hues. Because the DNA recombination is permanent, the color barcode of a cell is inherited by daughter cells during cell division, enabling determination of the parental origin of cellular progeny. The first of these models utilized neuron-specific promoters to express the rainbow labels, i.e., Brainbow (Cai et al., 2013; Livet et al., 2007). A confetti mouse model was also engineered to extend studies to non-neuronal cell types by exchanging the Thy1 neuron-specific promoter to a ubiquitous CAG

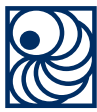

promoter upstream of a modified Brainbow cassette containing three unique fluorescent proteins in tandem (Snipert et al., 2010). A limitation of the Confetti model is that the color reporters are differentially expressed by Cre-mediated inversion rather than deletion, which can cause a single cell to change colors multiple times rather than maintain a permanent label. Both models are also limited in their applicability to cell morphology studies because some of the fluorescent reporters lack membrane targeting. A more recent version, Brainbow 3.2, permanently barcodes neurons with fluorescent proteins that are all targeted to the plasma membrane, thereby facilitating lineage tracing, delineation of individual cells, and morphological analysis (Cai et al., 2013). While this fluorescent lineage technology has been utilized extensively *in vivo*, to our knowledge it has not been applied to human stem biology. Indeed, rainbow stem cell lines would permit repeated assessment of the same cell and its progeny over long periods of time *in vitro*, enabling assessment of cell dynamics, such as rates of clonal expansion, cell-cycle kinetics, and synchronization of cell divisions, which cannot be assessed with the current *in vivo* rainbow technology. In addition, membrane-targeted fluorescent signals could be leveraged to measure temporal changes in cell morphology.

Here, we demonstrated that engineering a knockin PSC line with the Brainbow 3.2 cassette under the control of a CAG promoter enabled repeated live imaging of fluorescently barcoded PSCs and robust quantification of cell dynamics during PSC self-renewal and differentiation into multiple cell types. Moreover, directed differentiation of the rainbow PSCs into cortical neurons uncovered that 3D cortical structures are derived from clonal expansion of dominant progenitors, a finding made possible by using the rainbow reporter stem cell line. In total this work reports the generation of the first, to our knowledge, rainbow human PSC lines and demonstrates the broad utility of this tool to track single-cell behavior and clonal expansion of lineages in real time and throughout directed differentiation.

## RESULTS

### Engineering Rainbow Knockin Stem Cell Lines

To generate a ubiquitous rainbow cell reporter WTC11 human induced PSC (hiPSC) line, a cassette containing a constitutively active CAG (CMV early enhancer, chicken  $\beta$ -actin promoter, and rabbit  $\beta$ -globin splice acceptor) promoter upstream of three distinct fluorescent proteins (eGFP, mOrange2, and mKate2, hereafter referred to as GFP, RFP, and FRFP) that possess a stop codon and are flanked with incompatible lox sequences for Cre-mediated recombination was knocked into the AAVS1 safe harbor lo-

cus (Figure 1A). The construct is designed such that a non-fluorescent nuclear-localized GFP-mutant (nFP) is constitutively expressed until Cre treatment, which initiates permanent recombination of the construct. These recombination events cause one of three fluorescent proteins to be expressed on the cell membrane that is passed on to its progeny. Targeted knockin was confirmed and lines with multiple copies of the cassette were generated (Figures S1A and S1B), allowing for the expression of unique color combinations in individual cells, which act as a visible fluorescent barcode (Figure 1B). We selected a knockin line with 4 copies of the rainbow cassette for further study as it permits the expression of 18 unique hues (Figure 1B).

Rainbow hiPSCs were treated with different doses of recombinant cell-permeant Cre to vary fluorescent protein expression. The proportion of labeled cells and diversity of color barcodes were assessed 72 h or several weeks (passaged) after Cre treatment (Figures 1C and S1C). Using confocal microscopy with white light laser and spectral detector settings that prevented bleed-through of fluorescent signals demonstrated that the proportion of labeled cells and color diversity could be titrated by varying Cre dose. A low Cre dose of 6  $\mu$ g/mL resulted in recombination of only a single rainbow cassette as demonstrated by the expression of primary colors (red, green, and blue) at equal percentages of labeled cells (Figure 1D). High Cre doses induced the expression of additional hues, which develop via the expression of more than one fluorescent protein yielding cells with yellow, purple, or turquoise, and a reduced percentage of primary colors (Figure 1D). Reporter expression was stable in cells that had been passaged eight or more times after initial Cre treatment with the percentage of labeled cells and the distribution of hues remaining consistent after many passages (Figures 1D and 1E), indicating there was no selection against labeled cells and that no particular color had a proliferative advantage on a cell population level.

Rainbow hiPSCs retained their stemness, expressing stem cell markers Oct4 (Figures 1F and 1G) and Tra-1-60 (Figure S1D), and did not have chromosomal abnormalities in their karyotype (Figure S1E). Site-specific copy-number analysis showed no differences between non-transgenic and rainbow hiPSCs for the 20q11.21 locus (Figure S1F), which can confer a proliferative advantage (Baker et al., 2016). Immunostaining with antibodies that can distinguish each fluorescent protein as well as nFP showed individual cells that expressed all the fluorescent proteins and lacked nuclear-localized nFP expression, indicating that all four rainbow cassettes could be recombined when treated with high Cre dose (Figure S2). The immunostaining and choice of secondary antibodies also allowed us to visualize the spectral diversity of the cells using standard filter cubes (Figure S2). A rainbow reporter in the RUES2

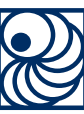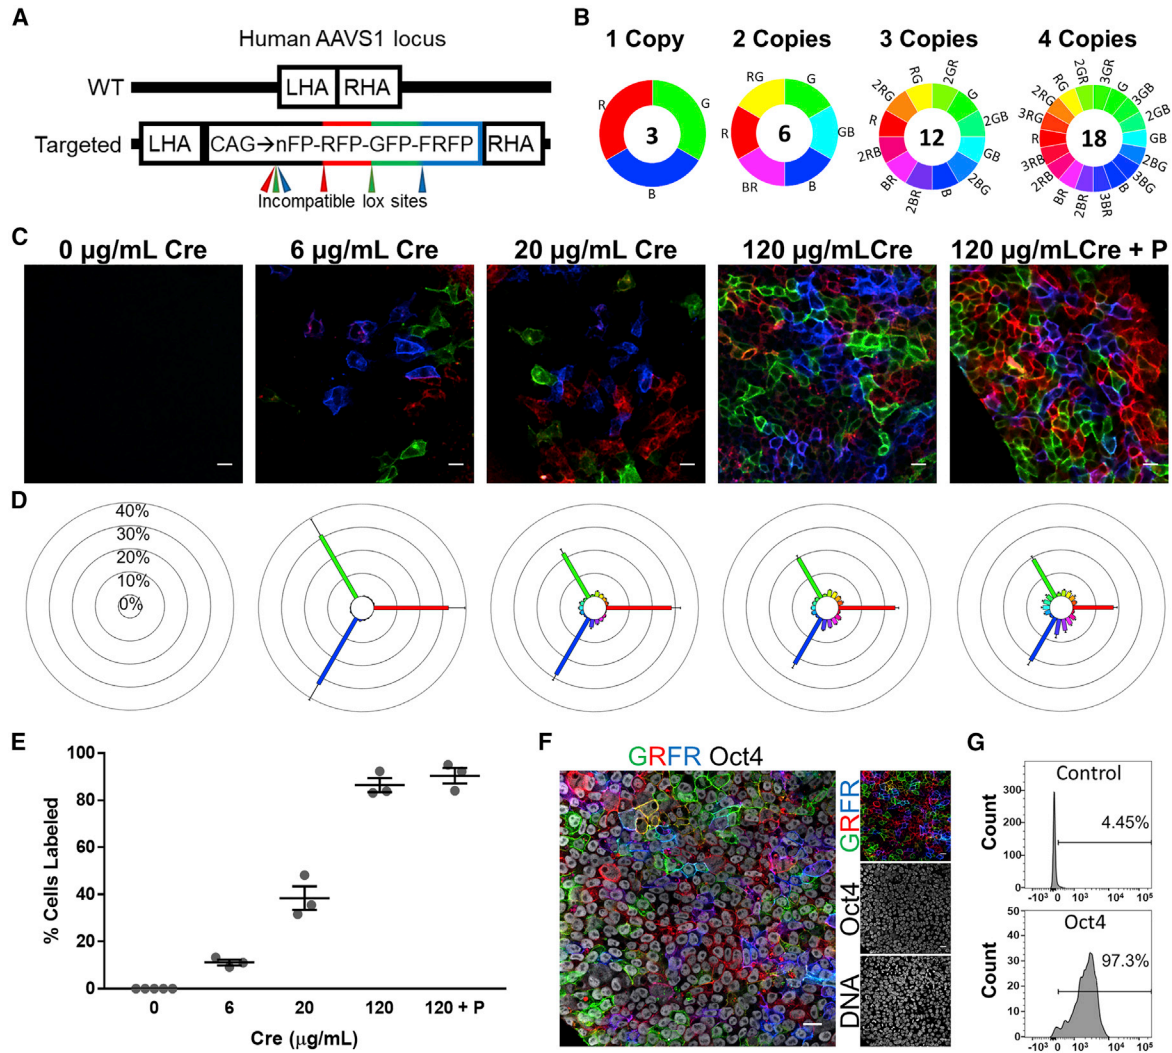

### Figure 1. Authentication of the Rainbow hiPSC Model

(A) Schematic of the human AAVS1 safe harbor locus depicting the wild-type allele with left homology arm (LHA) and right homology arm (RHA) (top) and targeted, knocked-in rainbow cassette containing GFP, RFP, and FRFP flanked by incompatible lox sites for Cre-mediated recombination (bottom).

(B) The number of unique hues possible for a given number of copies of the rainbow cassette. Recombination outcomes that result in the same hue, i.e., recombination of one cassette that expresses RFP versus two cassettes that both express RFP, were considered one unique hue.

(C) Representative confocal images of rainbow hiPSCs that were treated with various doses of Cre and imaged using white light laser and spectral detector settings that prevented spectral bleed-through of the fluorescent proteins. Cells were imaged 72 h after Cre treatment (0–120 µg/mL), or after more than eight passages (120 µg/mL + P). Scale bars, 20 µm.

(D) Spectral analysis of the percentage distribution of hues from the various Cre doses.

(E) Proportion of cells expressing at least one fluorescent protein with varying Cre doses.

(F) Native rainbow fluorescence and immunofluorescence imaging of Oct4. Scale bar, 20 µm.

(G) Representative trace of flow cytometry analysis of Oct4+ rainbow hiPSCs, controls were treated equally but without addition of primary antibody to Oct4.

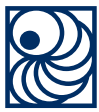

human embryonic PSC line was validated using the same approach (Figure S3).

### Tracking Single-Cell Proliferation Kinetics Reveals that hiPSCs Synchronously Divide

To confirm that our rainbow line was a suitable reporter of cell proliferation, immunostaining of phosphorylated histone H3 was performed to quantify the percentage of mitotic cells in isogenic wild-type WTC11 and rainbow knockin hiPSCs after high-dose Cre treatment. Analysis at 24, 48, and 72 h after plating indicated that there were no differences in proliferation between Cre-treated multi-colored rainbow hiPSCs, rainbow hiPSCs with no Cre treatment, or non-transgenic control hiPSCs at any time point (Figures S4A and S4B). In addition, analysis of TUNEL positivity at 72 h after seeding showed no differences in apoptosis between these groups (Figure S4C).

Rainbow hiPSCs were live imaged and tracked over 24 h (Figure 2A; Videos S1, S2, and S3) to examine hiPSC proliferation in real time and quantify cell-cycle kinetics. Because individual hiPSCs were distinguishable by the rainbow barcodes and that images were acquired with fine temporal resolution that captured cytokinesis events, we were able to follow cell division as a parent cell divided into two daughter cells (D1 and D2) and continue tracking subsequent cell divisions of daughters into granddaughter cells (e.g., D1.1 and D1.2, Figure 2B). Tracking cell-cycle duration of daughter cells, as well as tracking cells that originated from the same progenitor at the time of plating, showed that cell-cycle duration in these groups had no differences compared with all cells examined (Figure 2C). To our knowledge, this analysis is the first to report hiPSC proliferation kinetics in which the average cell-cycle duration was  $13.6 \pm 0.14$  h, which is consistent with other reports in human and mammalian embryonic stem cells, which estimated 11–16-h cell-cycle lengths (Orford and Scadden, 2008).

A common feature of early metazoan embryogenesis, including mice and humans, is synchronized cell division in PSCs *in vivo* (O'Farrell et al., 2004; Wong et al., 2010; Me-seguer et al., 2011; Desai et al., 2014; Deneke et al., 2016). In contrast, *in vitro* studies of mammalian PSCs have suggested PSC divisions are not synchronized, unless one manipulates the cell-cycle machinery with chemical inhibitors or serum deprivation (Zhang et al., 2005; Yiangou et al., 2019). However, tracking the timing of cell divisions in progeny that arose from a single PSC demonstrated that PSCs arising from the same lineage underwent synchronous cell divisions (Figure 2D). We observed that sister cells divided within  $0.64 \pm 0.10$  h of each other and cells of the same lineage divided within  $0.78 \pm 0.16$  h. In contrast, any given cell divided within  $6.79 \pm 0.19$  h of the average division of the population, consistent with the apparent asyn-

chronous behavior observed *in vitro* (Zhang et al., 2005). Finally, of all the cells examined, we observed that  $2.7\% \pm 0.9\%$  underwent apoptosis (Figure S4D), which is consistent with results using TUNEL quantification (Figure S4C). These results demonstrate cell-cycle kinetics and synchronization of cell divisions can be quantified with the rainbow reporter.

### Long-Term, Longitudinal Assessment of Live hiPSCs Reveals Heterogeneous Clonal Expansion

To extend the longitudinal assessments to periods lasting more than a week, hiPSCs were imaged 2 h after sparsely seeding (day 0) and then repeated imaging occurred once every 24 h for 7 days (Figures 3A and 3B). To prevent distinct clones of the same hue from becoming near each other due to migration and/or proliferation, rainbow hiPSCs treated with 120  $\mu\text{g}/\text{mL}$  Cre to achieve a high color diversity were mixed with rainbow hiPSCs that were not treated with Cre at a 1:10 ratio. The number of cells per clone was quantified at each time point (Figure 3C). On average the number of cells per clone increased from 1.2 cells at plating (day 0) to 324.4 cells after a week of culture ( $p < 0.0001$ ). The greatest rate of clonal expansion occurred at 3 to 4 days after plating, which then slowed as the cultures became confluent ( $p < 0.05$  versus rate of expansion day 6–7, Figure 3C). Vast differences between the expansion rate of individual clones was observed. For instance, two individual cells plated on day 0 expanded to colonies containing 53 and 1,054 cells by day 7, which indicates a clonal expansion rate of 1.87-fold increase per day versus 3.13-fold per day (Figure 3D). These results suggest that mechanisms intrinsic to the cells or cues arising from their microenvironment, such as cell crowding, have effects on clonal expansion. On a cell population level, however, no particular hue or color combination of cells had a proliferative advantage, as demonstrated by the consistency of color distribution after more than eight passages (Figure 1D). To minimize the effect of cell crowding, rainbow hiPSCs were examined in clonogenic conditions where each colony was derived from an individual cell and did not experience crowding from other colonies over a week of culture (Figures 3E and 3F). The average doubling time was  $20.8 \pm 0.9$  h, similar to standard culture conditions ( $22.2 \pm 2.2$  h,  $p > 0.55$ ). This analysis highlights how heterogeneous clonal expansion can be uncovered using live-cell rainbow barcodes.

### hiPSCs Undergo Dynamic Morphogenesis

To understand how cell morphology changes during a cell cycle, time-lapse datasets were analyzed (Figure 2; Videos S1, S2, and S3) and the membrane-localized fluorescent signal was traced throughout the cell cycle (Video S4). Newborn cells hypertrophied through the cell cycle, being

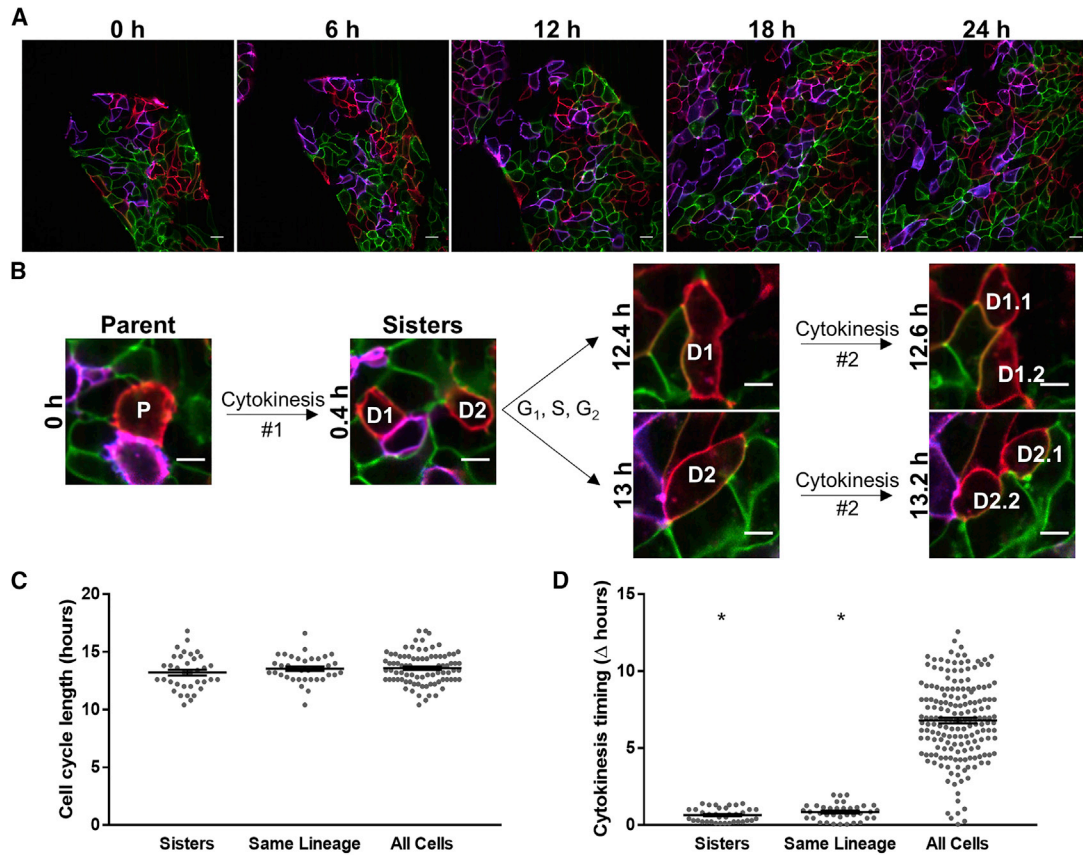

### Figure 2. Real-Time, Longitudinal Assessment of Proliferation Kinetics in Live hiPSCs Reveals Synchronized Cell Divisions

(A) Representative images of 24-h time lapses (121 × 12 min frames spanning the period of 3–4 days after plating, related to Videos S1, S2, and S3). One frame every 6 h during a time lapse is shown. Scale bars, 20 μm.

(B) Representative example of tracking single parental cell (P) just before it divides (t = 0 h), its daughters (D1 and D2 sisters), and granddaughters (D1.1, D1.2, D2.1, and D2.2). Scale bars, 10 μm.

(C) Quantification of cell-cycle duration of tracked sister cells, cells from the same lineage (common ancestor cell at time of plating), and all cells measured.

(D) Difference from mean cell division time point among sister cells, cells from the same lineage, and all cells. \*p < 0.05 versus all cells.

largest just before cell division (Figure 4A), consistent with previous reports in mammalian cells (Girshovitz and Shaked, 2012; Lloyd et al., 2000). The boundaries of cells in the previous dataset (Figure 3) were traced to determine how their area changed 1 week in culture. Cell area decreased with confluency (Figure 4B) as indicated by 390.8 μm<sup>2</sup> at day 0 versus 134 μm<sup>2</sup> at day 7 (p < 0.0001). However, examination of confocal z stacks (Figure 4C and Video S5) showed that as cells become smaller in their lateral dimensions they grow taller in height (9.2 μm at day 0 versus 38.1 μm at day 7, p < 0.0001) (Figure 4D), demonstrating that hiPSCs do not get smaller when confluent but rather change shape.

The rainbow reporter also enabled delineation of individual hiPSCs within densely packed colonies, which revealed a highly migratory behavior. Their migration was assessed by tracking the position of the cells over time (Figure 4E;

Videos S1, S2, and S3) and quantifying the overall distance traveled and direction of migration (Figure 4F). The migration behavior was different between the tracked cells, with velocities ranging from 7.3 to 20.3 μm/h. Some hiPSCs located on the colony's edge could translocate interiorly while others remained at the edge during colony expansion (Figure 4G). Tracking spatial locations of a cell within a colony can yield new information regarding geometric cues, as recent work identified a subpopulation of PSCs on colony edges that share hallmark properties with primitive endoderm, with distinct cell states compared with those in the interior (Nakanishi et al., 2019; Yoney et al., 2018). To understand the kinetics of PSC translocation from the perimeter to the interior, PSCs at the edge of colonies were tracked over a period of 12 h and analyzed for position changes from the edge to the interior (Figure 4H). Over this observation period, 84% of the cells divided and none

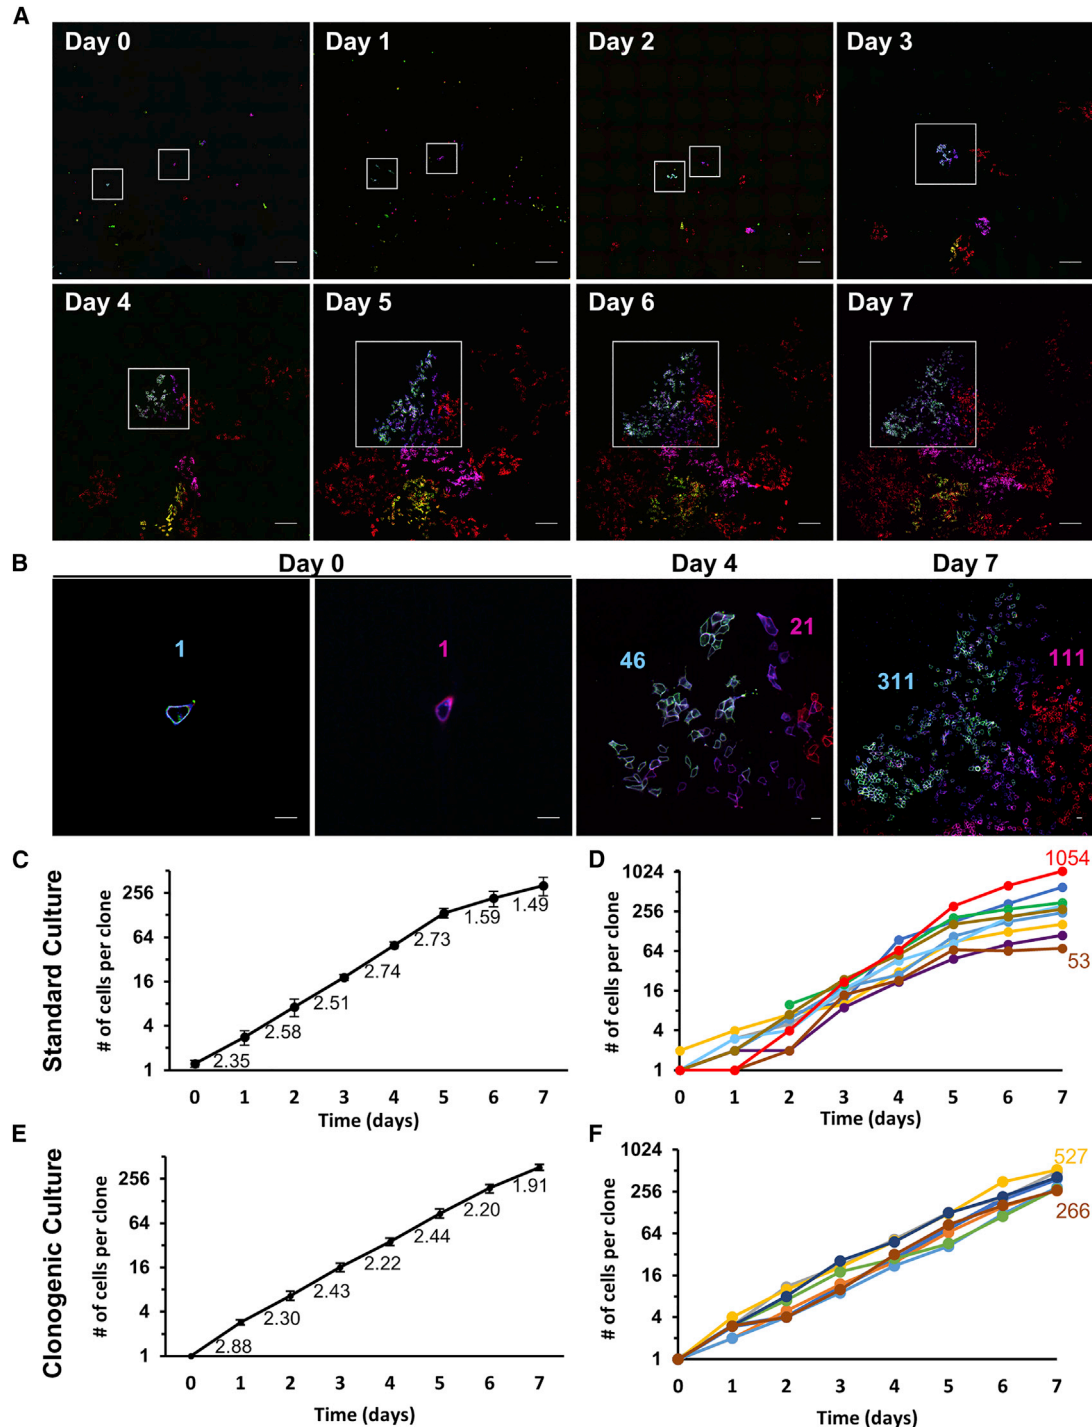

**Figure 3. Long-Term, Longitudinal Assessment of Live hiPSCs Reveals Heterogeneous Clonal Expansion**

(A) Labeled cells were mixed 1:10 with nonlabeled transgenic hiPSCs, seeded sparsely, and repeat imaged once every 24 h for 8 days on a live-imaging spinning disk confocal microscope. Day 0 = 2 h after plating and all following time points are in 24-h intervals. Scale bars, 200  $\mu$ m.

(B) Single-cell resolution images of two clones with cell number denoted in the same color as the respective clone at day 0, 4, and 7 after seeding. Scale bars, 20  $\mu$ m.

(legend continued on next page)



underwent apoptosis, so all the cells starting at the colony edge and their progeny were able to be tracked. By 6 h,  $47.9\% \pm 4.3\%$  of the cells that started at the edge were still localized there ( $p < 0.001$  versus 0 h), and by 12 h this dropped to  $34.6\% \pm 5.6\%$  of the cells ( $p < 0.001$  versus 0 h) (Figure 4H). Of the cells that migrated to the interior after 6 h, only  $4.2\% \pm 3.4\%$  migrated back to the colony edge in the subsequent 6 h, suggesting that hiPSCs dynamically migrate within PSC colonies and translocate from the periphery to the interior compartment. The rainbow stem cell colony centers migrated  $211.7 \pm 12.9 \mu\text{m}$  per day (Figures 4I and 4J). Colony fusion events over long periods of culture were clearly distinguishable (Figures 4I and 4J), including the formation of colonies that arose from multiple, distinct fusion events. Together, these results demonstrate the membrane-specific labeling can be exploited to assess the morphogenesis of rainbow-barcoded cells and colonies.

### Rainbow hiPSCs Are Pluripotent and Maintain Reporter Expression throughout Differentiation to all Germ Layers

Rainbow hiPSCs were differentiated to cortical neurons (ectoderm), cardiac myocytes (mesoderm), and hepatoblasts (endoderm) (Figure S5A) as defined by the expression of key proteomic markers (Gantz et al., 2012; Mariani et al., 2012; Mallanna and Duncan, 2013) (Figures 5A–5C). These data demonstrate that the rainbow reporter is maintained during directed differentiation to all three germ layers and innocuous with respect to their pluripotency (Figures 5A–5C). Because neurogenesis encompasses clonal expansion, cell migration, and dramatic morphological changes (Lancaster et al., 2013), we examined whether these behaviors could be tracked with the rainbow reporter in differentiated neurons. Here images were acquired daily during the first weeks of neurogenesis as hiPSCs committed to the neural lineage (Figures S5B–S5F). Tracking individual cells and repeat imaging of their progeny provided evidence of clonal expansion during the formation of Sox2+ neuronal progenitor cells (NPCs) (Figures S5B and S5C). Subsequent live imaging demonstrated clonal expansion and dispersal of NPCs as they elongated and radially aligned to form neural rosettes, which were similar in structure compared with the isogenic wild-type control (Figures S5D–S5F). Similarly, cells were repeat imaged during the differentiation of rainbow hiPSCs to cardiac myocytes, demonstrating clonal expansion of cardiac progenitors, maturation as indicated by hypertrophy, and high levels of cardiac troponin T

expression (Figures 5D and S5G). Functional assessment of rainbow-labeled hiPSC-derived cardiac myocytes demonstrated that contractions could be visualized by imaging deformations of the rainbow-colored membranes at a high frame rate (Video S6). In addition, the rainbow reporter could be activated with temporal control based on the timing of Cre delivery, as shown by labeling cardiac myocytes after unlabeled rainbow hiPSCs underwent differentiation (Figure S5H). These findings confirm that the rainbow reporter can broadly assess clonal expansion and morphogenesis longitudinally in differentiated cells and hiPSCs.

### Self-Assembled 3D Cortical Structures Are Derived from Clonally Dominant Progenitors

Since the rainbow reporter was stable and could be visualized over week-long periods of differentiation, time-lapse analysis studies were extended to assess the later phases of neurogenesis that encompass cortical neuron formation and terminal differentiation. After 24 days of NPC differentiation and expansion, NPC cultures were dissociated into single cells, replated, and repeat imaged over the subsequent 30 days of cortical neuron differentiation. By day 54, a few clonally dominant NPCs had generated most of the cells in the cultures, as demonstrated by large clusters harboring the same fluorescent barcode (Figures 6A and 6B). Assessment at 3 days after replating (day 27) demonstrated homogeneous dissociation and mixing of cells that expressed a broad range of color barcodes (Figures 6A and 6B), confirming that clonal dominance was not driven by initially seeding large clusters of same-colored NPCs. Time-lapse images showed expansion of a subset of clones, further confirming this finding (Figures 6A and 6B). The day 54 culture was primarily neurons, although we noted DCX<sup>-</sup> Map2<sup>-</sup> cells at the center of massive clonal aggregates that had formed (Figures 6A and 6B). Confocal imaging revealed these clonal aggregates were three-dimensional and had multiple cell layers, reaching greater than 100  $\mu\text{m}$  in height (Figure 6C).

To better understand the formation and identity of cells in these 3D structures, confocal z stacks over the live-imaging time course were examined. The membrane-targeted label revealed that, by day 38, NPCs in the monolayer culture had self-organized into radially aligned cells forming a ventricular zone (VZ) in these aggregates (Figure 6B, inset). Imaging at subsequent time points showed neurites extending out from the VZs (Figure 6B; Video S7). These features closely resemble neurogenesis in the developing neural

(C and E) Quantification of average clonal expansion over the course of standard culture (C) and clonogenic conditions (E), fold increase in cell number per clone indicated below the line.

(D and F) Cell number per clone plotted individually for each clone in standard culture (D) and clonogenic conditions (F), highlighting divergent clonal expansion.

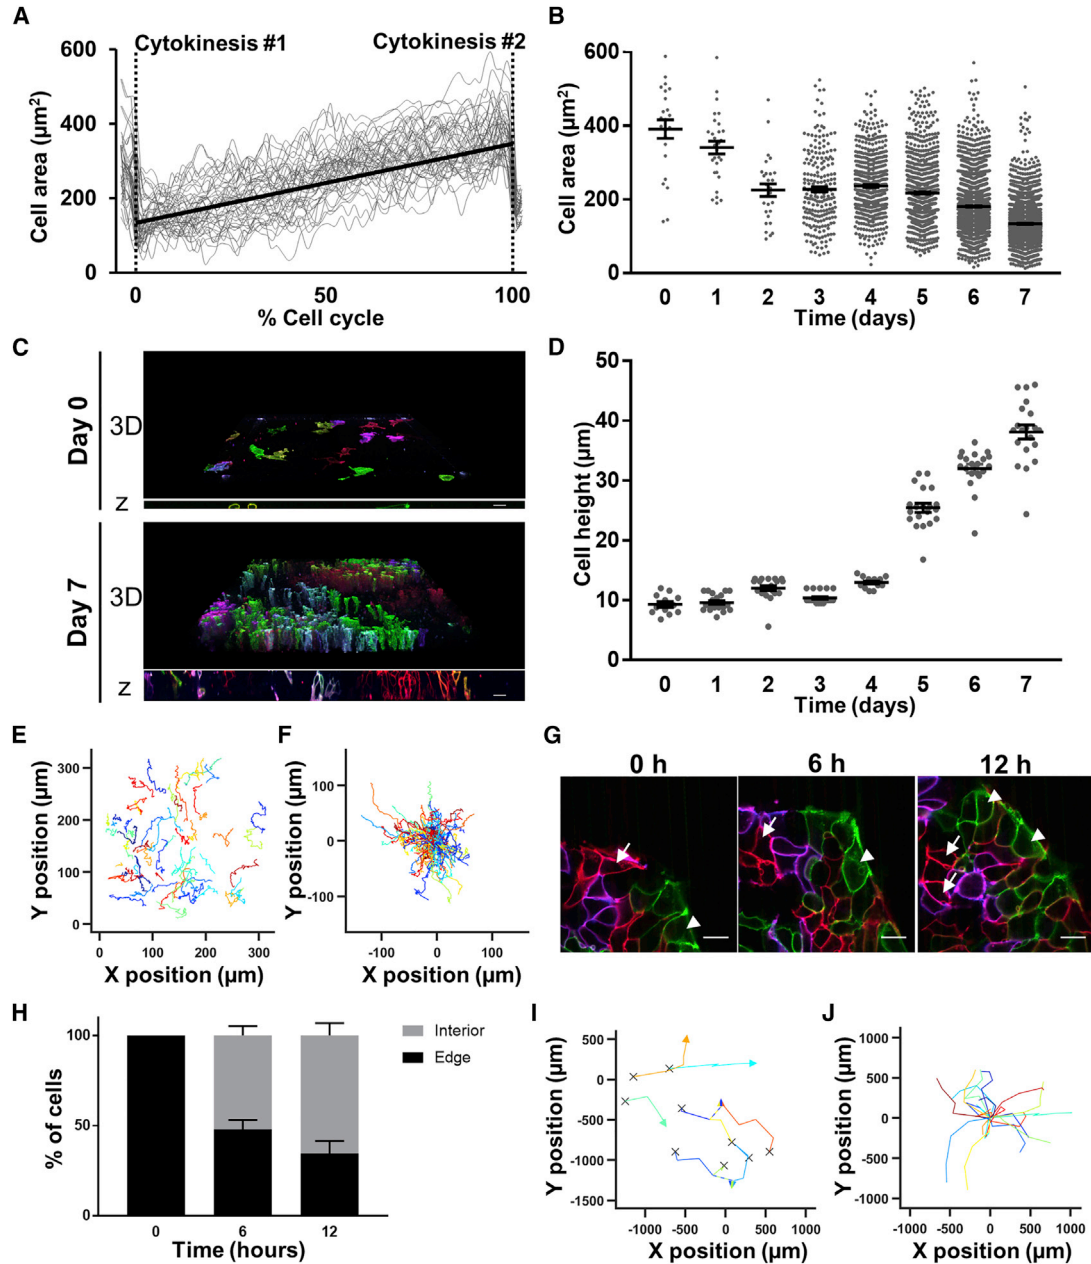

**Figure 4. Longitudinal Assessment of hiPSC Morphogenesis Reveals Hypertrophy in Cell-Cycle Growth Phase, Confluency-Induced Shape Changes, and Colony Migration**

(A) Cell area measurements spanning two cell divisions with cell area measured every 12 min. The duration of each cells' cell-cycle length was normalized to the percentage of the cell cycle. Gray lines indicate individual cells, black line indicates line of best fit, and dashed vertical lines indicate cytokinesis time points at 0% and 100% of the cell cycle.

(B) Cell area measurements over 8 days in culture.

(C) Examples of 3D reconstructions at days 0 and 7 after plating ( $601 \times 601 \mu\text{m}$ ,  $0.4\text{-}\mu\text{m}$  steps). Scale bar,  $20 \mu\text{m}$ .

(D) Quantification of cell height over 8 days.

(E and F) Migration analysis tracking absolute (E) or relative (F) positions of individual hiPSCs.

(G) Representative image showing an example of one parental cell on the colony perimeter at 0 h that gave rise to two internally localized cells at 12 h (white arrows) and another that gave rise to two cells with maintained peripheral localization (white arrowheads). Scale bars,  $20 \mu\text{m}$ .

(legend continued on next page)





tube and telencephalon *in vivo* (Graham et al., 2003; Moreno and González, 2017), as well as cortical organoids generated by PSC differentiations in 3D droplets (Lancaster et al., 2013; Paşca et al., 2019), suggesting that monolayer differentiations also result in the formation of complex cortical structures. Immunostaining at day 54 confirmed that the NPC identity of the radially aligned cells persisted in the VZs, staining positive for Sox2 and Pax6 (Figures S6A and S6B). Analysis of the rainbow reporter and neurite markers at day 54 demonstrated that NPCs in VZs generated neurons expressing the same color barcode, with newborn DCX<sup>+</sup> neurons residing proximal to the VZ and MAP2<sup>+</sup> terminally differentiated neurons localizing more distal to the VZ (Figures 6B, 6C, and S6A), consistent with neurogenesis *in vivo* (Johnson et al., 2018; Moreno and González, 2017). Co-staining of Pax6 and TBR1 (Figure S6C) confirmed the self-organized spatial patterning of NPCs and postmitotic cortical projection neurons *in vitro* were consistent with mammalian corticogenesis *in vivo* (Bedogni et al., 2010; Englund et al., 2005).

Surprisingly, of the 183 VZs examined at day 54, 89.1% were entirely comprised of NPCs expressing the same color (Figures 6D and 6E), with the remainder consisting of NPCs with multiple distinct fluorescent barcodes (Figure S6D). To verify that this was driven by clonal expansion of NPCs, we examined markers of cell proliferation *in situ*. Ki67 and mitotic chromatin bodies were observed in Pax6<sup>+</sup> VZ NPCs, confirming their proliferative phenotype, but not in postmitotic TBR1<sup>+</sup> neurons (Figures 6F and 6G). Thus, by tracking barcoded NPCs as they differentiated, the rainbow reporter revealed that most cortical VZs are derived from a single clonally dominant NPC.

## DISCUSSION

A new era of single-cell analyses, such as single-cell transcriptomics and single-cell epigenomics assays, has highlighted the wide range of molecular profiles that were previously unappreciated in bulk population assays (Angermueller et al., 2016; Cusanovich et al., 2018; Nakanishi et al., 2019; Nestorowa et al., 2016). These findings have been of special relevance to stem cell biology and directed differentiation approaches as they discovered transcriptional and epigenetic heterogeneity that were inferred to affect cellular functions, despite homogeneous expression of cell-type-specific markers within the populations (Angermueller et al., 2016; Friedman et al., 2018; Ku-

mar et al., 2017). Here, we present a novel way to directly assess the phenotypic heterogeneity of individual PSCs and their differentiated derivatives within a population by labeling their membranes with unique colors and tracking them longitudinally by live-cell imaging. This reporter is stably maintained through PSC differentiations and can also be induced with temporal control to label PSCs and their progeny in their differentiated or undifferentiated states. An array of cell behaviors can be extracted from the reporter, including cell-cycle kinetics, clonal expansion, apoptosis, cell morphology, and migration. We further demonstrate that the longitudinal single-cell lineage tracing and phenotyping afforded by this reporter can be supplemented with *in situ* molecular analyses of cell type and subcellular structures.

Tracking NPCs over a month of cortical neuron differentiation led to the surprise finding that clonally dominant progenitors self-aggregate to form complex cortical structures. The finding that monolayer cultures generate 3D cortical structures suggests that the differentiation protocol robustly recapitulates *in vivo* signaling where the planar neural plate gives rise to the neural tube and its derivatives through morphogenesis (Yamaguchi et al., 2011). Longitudinal live imaging enabled determination of the timing of key neurogenesis events, such as VZ formation and neurite outgrowth. The membrane labels provided readouts for cell morphology, enabling clear determination of radial alignment and neurite formation. Although the underlying mechanisms remain incompletely understood, this analysis suggests clonal dominance results in VZs derived from a single NPC. Interestingly, unlike hiPSCs (Figures 4E and 4F) and NPCs expanding in media containing FGF (Figure S5D), NPCs cultured in neuron differentiation media without FGF displayed limited migration and dispersal. Consistent with this notion, the role of FGF in cell migration and early patterning of the neural primordium is well documented (Guillemot and Zimmer, 2011). While this warrants further study, the lack of NPC dispersal and mixing in differentiation media may contribute to the clonality of the VZs. In contrast to VZ NPCs, neurites from diverse lineages, expressing distinct color barcodes, intermixed and projected to distant VZs, suggesting that neural networks form between VZs. Live imaging also demonstrated loss of clones over time, which may be related to NPC pruning in early neurogenesis (Yamaguchi et al., 2011). Although the dominance of a subset of NPCs resulting in clonal VZs was initially surprising to us, these findings are in line with neurogenesis in chick spinal cord. Studies using very sparse

(H) Analysis of edge PSCs showing the proportion remaining on the edge or translocating interiorly at each time point.

(I and J) Migration analysis tracking absolute (I) or relative (J) hiPSC colony centroid position from days 0 to 4. (I) "X" denotes colony start position and arrowheads indicate colony end position. Colony fusion events are indicated by dashed lines and split color arrowheads.

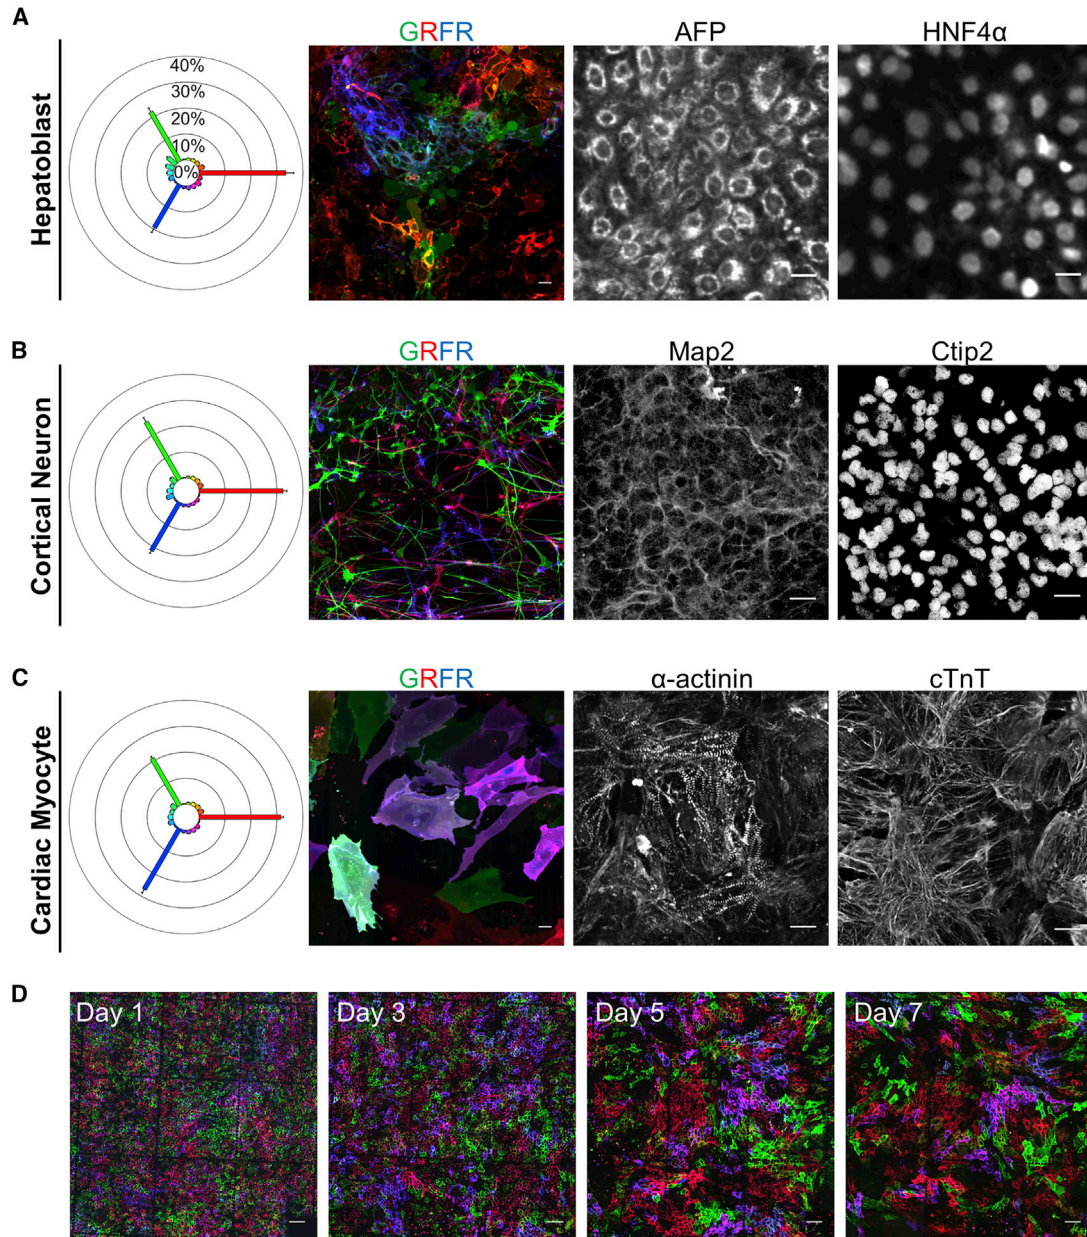

**Figure 5. Rainbow hiPSCs Have the Capacity to Differentiate to All Germ Layers and Maintain Reporter Expression**

(A–C) All differentiations started with high-dose Cre-treated rainbow hiPSCs replated at day 0. Spectral analysis of color diversity, rainbow reporter signal, and respective cell-type-specific marker expression in (A) hepatoblasts, (B) cortical neurons, and (C) cardiac myocytes. Scale bars, 20  $\mu$ m.

(D) Repeat imaging of rainbow-labeled hiPSCs to cardiomyocytes starting from the first day of differentiation through 1 week (days 1–7). Scale bars, 100  $\mu$ m.

labeling (Leber and Sanes, 1995), and more recently rainbow labeling (Loulrier et al., 2014), have demonstrated that discrete segments of the chick spinal cord are derived from individual progenitor cells that clonally expand and align around the VZ. Thus, this work provides the first evidence that similar clonality exists in models of human cere-

bral tissue. Since dysregulated NPC expansion can result in microcephaly or megacephaly (Chenn and Walsh, 2002; Johnson et al., 2018; Lancaster et al., 2013), understanding cellular mechanisms of NPC expansion on a per cell basis holds great potential to improve our understanding of neurodevelopmental disorders.

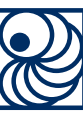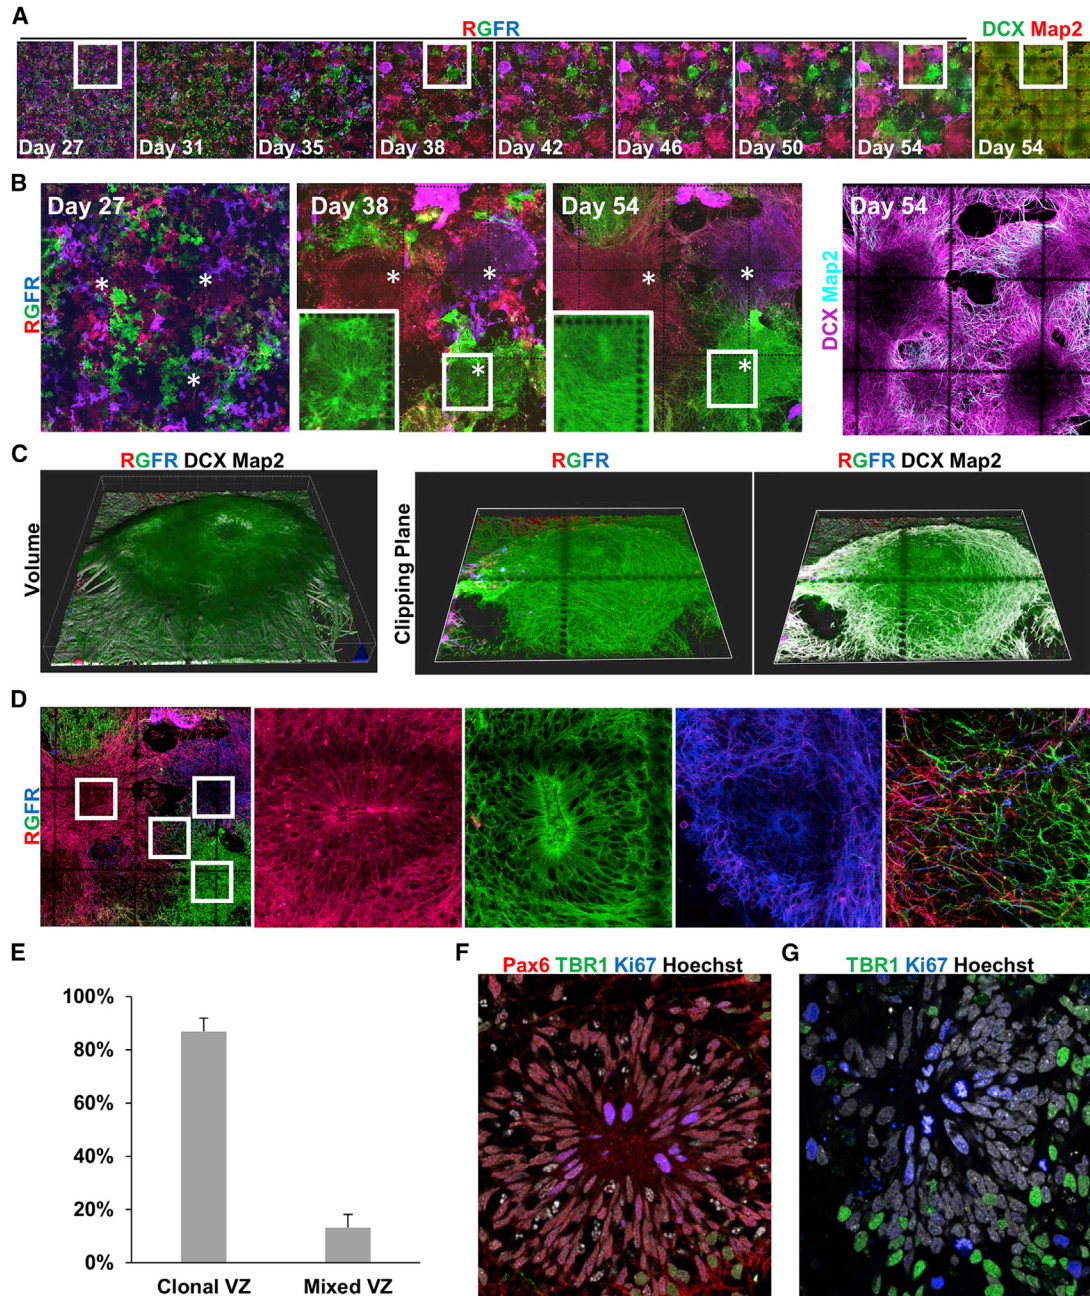

### Figure 6. Self-Assembled 3D Cortical Structures Are Derived from Clonally Dominant Progenitors

(A) Repeat imaging of the rainbow label in NPCs differentiating to cortical neurons, and immunostaining confirmation of neuronal differentiation at the day 54 endpoint.

(B) Higher-magnification of selected time points from (A). Asterisks indicate the starting position of three clones that were dominant. Insets are higher magnifications of different z planes of the boxed regions, localized 16  $\mu\text{m}$  above the culture substrate to visualize VZ structure.

(C) Day 54 3D reconstructions of the entire z stack volume and clipping planes through the volume, grid lines are 50  $\mu\text{m}$ , tick marks are 10  $\mu\text{m}$ .

(D) Examples of clonal VZs with insets showing higher magnifications of different z planes of the boxed regions highlighting VZ structure and distal neurite outgrowth.

(legend continued on next page)



Previous works have utilized fluorescent reporters in PSCs (Gantz et al., 2012; Megyola et al., 2013) where a specific lineage is labeled by a single color. While it is possible to use these models to assess cell phenotypes, previous studies assessing clonal expansion with a single marker used less than 1% labeling to prevent neighboring cells being labeled by chance (Leber and Sanes, 1995; Miyaoka et al., 2012). This contrasts with our ability to discern the membrane of individual cells in highly migratory, dense cell populations of PSCs where greater than 90% of cells were labeled (Video S4). The range of color diversity and the persistence of the barcodes enabled tracking of individual cells over a week of culture even after cells had exponentially expanded and mixed (Figures 3 and S5).

Novel observations of hiPSC cell-cycle kinetics were made with the rainbow reporter. Tracking individual cells over time revealed that hiPSCs from common ancestors had synchronized timing of cell divisions, consistent with PSC embryogenesis *in vivo* (O'Farrell et al., 2004; Denke et al., 2016). This finding was undiscernible in previous *in vitro* studies of bulk PSC populations that concluded that cell-cycle arrest via serum deprivation or chemical inhibition of cell-cycle machinery was required to achieve synchronized PSC divisions (Yiangou et al., 2019; Zhang et al., 2005). Although common ancestor cell-division synchrony persists over several divisions, we note that, considering all cells in our study were derived from a single-cell clone when we first generated the line, it appears that slight drift over time eventually leads to loss of synchrony. While less understood in humans, the extent of synchrony in the first few PSC divisions is predictive of embryo viability and implantation of *in vitro* fertilized human embryos (Desai et al., 2014; Meseguer et al., 2011; Wong et al., 2010), and the eventual loss of hiPSC division synchrony is consistent with studies in model organisms that demonstrated this synchronization persists for the first 13 rounds of cell division, which give rise to the 8,192 cell embryo (O'Farrell et al., 2004). Future studies aimed at promoting PSC synchronization or isolating synchronized PSCs will help optimize differentiation and cell therapy strategies as cell-division synchrony plays an important role in PSC cell type specification (Pauklin and Vallier, 2013; Sela et al., 2012; Yiangou et al., 2019) and improves the success of stem cell transplantation (Desai et al., 2014; Zhang et al., 2005).

We found that this reporter of single-cell lineage and clonal expansion had broader utility and enabled longitudinal quantification of cell morphology and migration. Studies have recently identified a subset population of PSCs that reside on the perimeter of PSC colonies (Li

et al., 2010; Nakanishi et al., 2019; Rosowski et al., 2015; Warmflash et al., 2014; Yoney et al., 2018). These edge PSCs share hallmark properties with primitive endoderm and display distinct non-canonical Wnt signaling and gene expression that enhance their colony initiation capacity compared with PSCs localized in the colony interior (Nakanishi et al., 2019; Yoney et al., 2018). Their study found that PSCs isolated from the colony interior could acquire the edge-PSC signature 3 days after single-cell dissociation and replating; however, it was unknown whether the edge subpopulation was stably localized to the colony perimeter. Our longitudinal study in intact PSC colonies found that only a subset of PSCs persistently localize to the colony edge, while most PSCs at the edge rapidly migrate interiorly, suggesting that the edge population is more dynamic and heterogeneous than previously appreciated. Interestingly, once PSCs exit the colony perimeter they very rarely return. This dynamic, one-way eviction from the colony periphery may be a mechanism that maintains colony shape as growing PSC colonies decrease the ratio of perimeter to internal cells (Peerani et al., 2007), which impacts PSC differentiation capacity (Peerani et al., 2007; Rosowski et al., 2015; Warmflash et al., 2014). In addition to labeling single cells, the reporter barcoded stem cell colonies, allowing unequivocal quantification of colony migration and tracking of colony fusion events. Morphological analysis showed that hiPSCs become taller and skinnier as the culture became confluent. Interestingly, after the first day of culture we saw reductions in cell area that were not accompanied with increases in cell height, which we attribute to the presence of ROCK inhibitor in the first 26 h of culture (day 0 and day 1 time points), which has been shown to promote cell spreading (Flevaris et al., 2007; Maldonado et al., 2016) without changing cell height (Nilius et al., 1999). Understanding the variability of these cellular phenotypes will be critical to standardize and efficiently manufacture stem cells for cell therapies (Jossen et al., 2018; Trindade et al., 2017).

The benefits of a multicolor reporter are accompanied with some limitations and special requirements. For complete avoidance of spectral bleed-through, specific microscope instrumentation (white light laser and spectral detector) (Figure 1) or fixation and staining of the samples (Figure S2) was needed, although native fluorescent protein signals could be distinguished with minimal spectral overlap using standard filters on our live-imaging system (i.e., Figure 3). We note that not all hues were present in equal proportion, with the primary colors being most abundant, although unsurprisingly the chance of having more than

(E) Quantification of the proportion of VZs derived from a single NPC (clonal VZ) or VZs derived from multiple NPCs. (F and G) examination of cell-cycle activity in NPCs and terminally differentiated cortical neurons. (A–G) Each coordinate grid represents a 500 × 500 μm square and each dot has a 10 μm diameter.



one recombination event (i.e., mixed, non-primary colors) increased with higher Cre dose (Figure 1). Consistently, we saw that most cells had at least one non-recombined rainbow cassette even in with high-dose (120  $\mu\text{g}/\text{mL}$ ) Cre based on staining for nFP (Figure S2), suggesting that color diversity will increase with higher Cre doses, although identification of the dose that yields the greatest amount of color diversity without Cre toxicity is key for future studies (Jones et al., 2005; Cardozo et al., 2007; Schmidt-Suppran and Rajewsky, 2007). In addition, the nature of using multiple distinct fluorescent proteins presents challenges as they do not possess identical characteristics, such as protein folding time and extinction coefficients. We note that mKate2 expression was visible 12 h after adding recombinant Cre, while the others were not present until 18 h (data not shown). This is consistent with reports showing faster fluorophore maturation in mKate2 (Shcherbo et al., 2009). Despite efforts to reduce photobleaching, with a highly refined imaging protocol that showed no signs of phototoxicity, we still observe that the photostability of mOrange2 was slightly lower, which caused very subtle changes in color over the course of our time-lapse imaging (Video S2, i.e., yellow eGFP<sup>+</sup>/mOrange2<sup>+</sup> cells become slightly greener by the end of the time lapse). This is consistent with reported extinction coefficient values for the fluorescent proteins used (Cranfill et al., 2016).

Altogether, this rainbow PSC cell line has broad utility for studying cell phenotypes over time and will enhance the field's understanding of cell state in self-renewing PSC cultures and in directed differentiations to specific cell types. The integration of single-cell molecular analysis with phenotypes revealed by this reporter opens new opportunities for forward genetics approaches that match observed proliferative and morphological phenotypes with specific molecular profiles. In conclusion, the rainbow PSC reporter line allows longitudinal tracking of individual cells and can uncover phenotypic heterogeneity that may improve human models of development, disease, drug discovery, and cell therapies.

## EXPERIMENTAL PROCEDURES

### PSC Culture and Differentiation

mTeSR Plus (STEMCELL Technologies) was used for PSC maintenance culture (medium changed daily) and was supplemented with 10  $\mu\text{m}$  Y27632 after passaging with StemPro Accutase (Gibco) onto Matrigel-coated vessels. Recombinant CreTAT (Cre fused to cell permeability peptide, Excellgen EG-1001) was added to medium for 6 h and the medium was then changed. Previously established differentiation protocols were used, as detailed in the Supplemental Material. All experiments were performed with passage 48–59 cells.

### Imaging and Analysis

Images of native rainbow reporter fluorescence for spectral analysis were collected on a Leica SP8 confocal microscope with white light laser and spectral detector settings detailed in the Supplemental Material. Live imaging was performed on a Nikon TiE equipped with a Yokogawa W1 spinning disk confocal system and high sensitivity EMCCD camera with configurations described in the Supplemental Material. Cells were manually traced and counted in ImageJ and cell area and centroid positions were determined using ImageJ's "measure" function. Traced cells were manually tracked in time-lapse experiments (as in Video S4) and the frame in which cytokinesis occurred for a given cell was recorded, with the time between frames being 12 min. Cell height was manually measured by analyzing z stacks taken with 0.4- $\mu\text{m}$  steps and the distance from the bottom to the top of the cell was calculated.

### Quantification and Statistical Analysis

GraphPad Prism v.7 was used for one- and two-way ANOVA, and Tukey *post hoc* tests. Standard one-way ANOVA was performed for data comprising Figures 1, 2, 4A, 4B, 4D, S1, S3, S4C, and repeat measures ANOVA was used for Figure 3. Two-way ANOVA was performed for Figures 4H and S4B. A p value of <0.05 was considered significant. All average values described in the text and figures are mean values and error bars represent standard error of the mean. Each quantification was derived from a minimum of three independent (different passages) experiments.

### Data and Code Availability

Further information and requests for data, code, resources and reagents should be directed to and will be fulfilled by the Lead Contact, Jennifer Davis ([jendavis@uw.edu](mailto:jendavis@uw.edu)).

### SUPPLEMENTAL INFORMATION

Supplemental Information can be found online at <https://doi.org/10.1016/j.stemcr.2020.06.005>.

### AUTHOR CONTRIBUTIONS

Conceptualization, D.E.-N., C.E.M., N.J.S., and J.D.; Methodology, D.E.-N., C.E.M., K.R.S., J.E.Y., N.J.S., and J.D.; Software, K.M.B.; Investigation and Validation, D.E.-N., K.S., K.M.B., R.M., M.C.R., and G.W.E.; Formal Analysis, D.E.-N., K.S., K.M.B., and G.W.E.; Writing – Original Draft, D.E.-N., N.J.S., and J.D.; Writing – Review & Editing, D.E.-N., C.E.M., K.R.S., N.J.S., and J.D.; Visualization, D.E.-N. and K.M.B.; Supervision, D.E.-N., C.E.M., N.J.S., and J.D.; Funding Acquisition, D.E.-N., C.E.M., K.R.S., J.E.Y., N.J.S., and J.D.

### DECLARATION OF INTERESTS

C.E.M. is a scientific founder and equity holder in Sana Biotechnology. C.E.M. holds a management position at Sana Biotechnology. C.E.M. and D.E.-N. hold patents related to heart regeneration technologies.

### ACKNOWLEDGMENTS

We acknowledge Julie Mathieu and the University of Washington's Institute for Stem Cell and Regenerative Medicine stem cell core,

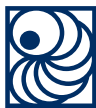

and Dale Hailey and Nathaniel Peters from the Garvey and Keck imaging cores. This work was supported by the following funding sources: NIH HL141187 and HL142624 (to J.D.), NSF CMMI-1661730 (to N.J.S.), NIHDP2HL137188 (to K.R.S.), NIH F32HL143851 (to D.E.-N.), Washington Research Foundation postdoctoral fellowship (to M.C.R.), Gree Family Gift (JD/NJS/KRS/CEM), the University of Washington Ellison Foundation (to J.E.Y.). C.E.M. was supported by NIH grants R01HL128362, U54DK107979, R01HL128368, R01HL141570, and R01HL146868, and a grant from the Fondation Leducq Transatlantic Network of Excellence.

Received: July 23, 2019

Revised: June 3, 2020

Accepted: June 3, 2020

Published: July 2, 2020

## REFERENCES

- Andäng, M., Hjerling-Leffler, J., Moliner, A., Lundgren, T.K., Castelo-Branco, G., Nanou, E., Pozas, E., Bryja, V., Halliez, S., Nishimaru, H., et al. (2008). Histone H2AX-dependent GABA(A) receptor regulation of stem cell proliferation. *Nature* *451*, 460–464.
- Angermueller, C., Clark, S.J., Lee, H.J., Macaulay, I.C., Teng, M.J., Hu, T.X., Krueger, F., Smallwood, S.A., Ponting, C.P., Voet, T., et al. (2016). Parallel single-cell sequencing links transcriptional and epigenetic heterogeneity. *Nat. Methods* *13*, 229–232.
- Baker, D., Hirst, A.J., Gokhale, P.J., Juarez, M.A., Williams, S., Wheeler, M., Bean, K., Allison, T.F., Moore, H.D., Andrews, P.W., et al. (2016). Detecting genetic mosaicism in cultures of human pluripotent stem cells. *Stem Cell Reports* *7*, 998–1012.
- Bedogni, F., Hodge, R.D., Elsen, G.E., Nelson, B.R., Daza, R.A., Beyer, R.P., Bammler, T.K., Rubenstein, J.L., and Hevner, R.F. (2010). Tbr1 regulates regional and laminar identity of postmitotic neurons in developing neocortex. *Proc. Natl. Acad. Sci. U S A* *107*, 13129–13134.
- van Berlo, J.H., and Molkentin, J.D. (2014). An emerging consensus on cardiac regeneration. *Nat. Med.* *20*, 1386–1393.
- Cai, D., Cohen, K.B., Luo, T., Lichtman, J.W., and Sanes, J.R. (2013). Improved tools for the Brainbow toolbox. *Nat. Methods* *10*, 540–547.
- Cardozo, A.K., Buchillier, V., Mathieu, M., Chen, J., Ortis, F., Ladrrière, L., Allaman-Pillet, N., Poirot, O., Kellenberger, S., Beckmann, J.S., and Eizirik, D.L. (2007). Cell-permeable peptides induce dose- and length-dependent cytotoxic effects. *Biochim. Biophys. Acta* *1768*, 2222–2234.
- Chenn, A., and Walsh, C.A. (2002). Regulation of cerebral cortical size by control of cell cycle exit in neural precursors. *Science* *297*, 365–369.
- Cranfill, P.J., Sell, B.R., Baird, M.A., Allen, J.R., Lavagnino, Z., De Gruiter, H.M., Kremers, G.J., Davidson, M.W., and Ustione, A. (2016). Quantitative assessment of fluorescent proteins. *Nat. Methods* *13*, 557–562.
- Cusanovich, D.A., Hill, A.J., Aghamirzaie, D., Daza, R.M., Pliner, H.A., Berletch, J.B., Filippova, G.N., Huang, X., Christiansen, L., DeWitt, W.S., et al. (2018). A single-cell atlas of in vivo mammalian chromatin accessibility. *Cell* *174*, 1309–1324.e18.
- Deneke, V.E., Melbinger, A., Vergassola, M., and Di Talia, S. (2016). Waves of Cdk1 activity in S phase synchronize the cell cycle in *Drosophila* embryos. *Dev. Cell* *38*, 399–412.
- Desai, N., Ploskonka, S., Goodman, L.R., Austin, C., Goldberg, J., and Falcone, T. (2014). Analysis of embryo morphokinetics, multinucleation and cleavage anomalies using continuous time-lapse monitoring in blastocyst transfer cycles. *Reprod. Biol. Endocrinol.* *12*, 54.
- Englund, C., Fink, A., Lau, C., Pham, D., Daza, R.A., Bulfone, A., Kowalczyk, T., and Hevner, R.F. (2005). Pax6, Tbr2, and Tbr1 are expressed sequentially by radial glia, intermediate progenitor cells, and postmitotic neurons in developing neocortex. *J. Neurosci.* *25*, 247–251.
- Flevaris, P., Stojanovic, A., Gong, H., Chishti, A., Welch, E., and Du, X. (2007). A molecular switch that controls cell spreading and retraction. *J. Cell Biol.* *179*, 553–565.
- Friedman, C.E., Nguyen, Q., Lukowski, S.W., Helfer, A., Chiu, H.S., Miklas, J., Levy, S., Suo, S., Han, J.D., Osteil, P., et al. (2018). Single-cell transcriptomic analysis of cardiac differentiation from human PSCs reveals HOPX-dependent cardiomyocyte maturation. *Cell Stem Cell* *23*, 586–598.e8.
- Gantz, J.A., Palpant, N.J., Welikson, R.E., Hauschka, S.D., Murry, C.E., and Laflamme, M.A. (2012). Targeted genomic integration of a selectable floxed dual fluorescence reporter in human embryonic stem cells. *PLoS One* *7*, e46971.
- Girshovitz, P., and Shaked, N.T. (2012). Generalized cell morphological parameters based on interferometric phase microscopy and their application to cell life cycle characterization. *Biomed. Opt. Express* *3*, 1757.
- Graham, V., Khudyakov, J., Ellis, P., and Pevny, L. (2003). SOX2 functions to maintain neural progenitor identity. *Neuron* *39*, 749–765.
- Guillemot, F., and Zimmer, C. (2011). From cradle to grave: the multiple roles of fibroblast growth factors in neural development. *Neuron* *71*, 574–588.
- Hannan, N.R.F., Segeritz, C.P., Touboul, T., and Vallier, L. (2013). Production of hepatocyte-like cells from human pluripotent stem cells. *Nat. Protoc.* *8*, 430–437.
- Inoue, H., Nagata, N., Kurokawa, H., and Yamanaka, S. (2014). iPS cells: a game changer for future medicine. *EMBO J.* *33*, 409–417.
- Johnson, M.B., Sun, X., Kodani, A., Borges-Monroy, R., Girsakis, K.M., Ryu, S.C., Wang, P.P., Patel, K., Gonzalez, D.M., Woo, Y.M., and Yan, Z. (2018). Aspm knockout ferret reveals an evolutionary mechanism governing cerebral cortical size. *Nature* *556*, 370–375.
- Jones, S.W., Christison, R., Bundell, K., Voyce, C.J., Brockbank, S.M., Newham, P., and Lindsay, M.A. (2005). Characterisation of cell-penetrating peptide-mediated peptide delivery. *Br. J. Pharmacol.* *145*, 1093–1102.
- Jossen, V., van den Bos, C., Eibl, R., and Eibl, D. (2018). Manufacturing human mesenchymal stem cells at clinical scale: process and regulatory challenges. *Appl. Microbiol. Biotechnol.* *102*, 3981.



- Kocsisova, Z., Mohammad, A., Kornfeld, K., and Schedl, T. (2018). Cell cycle analysis in the *C. elegans* germline with the thymidine analog EdU. *J. Vis. Exp.*, 58339. <https://doi.org/10.3791/58339>.
- Kumar, P., Tan, Y., and Cahan, P. (2017). Understanding development and stem cells using single cell-based analyses of gene expression. *Development* 144, 17–32.
- Kusuma, S., and Gerecht, S. (2013). Fast and furious: the mass and motion of stem cells. *Biophysical J.* 105, 837–838.
- Lancaster, M.A., Renner, M., Martin, C.A., Wenzel, D., Bicknell, L.S., Hurles, M.E., Homfray, T., Penninger, J.M., Jackson, A.P., and Knoblich, J.A. (2013). Cerebral organoids model human brain development and microcephaly. *Nature* 501, 373–379.
- Leber, S.M., and Sanes, J.R. (1995). Migratory paths of neurons and glia in the embryonic chick spinal cord. *J. Neurosci.* 15, 1236–1248.
- Li, D., Zhou, J., Wang, L., Shin, M.E., Su, P., Lei, X., Kuang, H., Guo, W., Yang, H., Cheng, L., et al. (2010). Integrated biochemical and mechanical signals regulate multifaceted human embryonic stem cell functions. *J. Cell Biol.* 191, 631–644.
- Livet, J., Weissman, T.A., Kang, H., Draft, R.W., Lu, J., Bennis, R.A., Sanes, J.R., and Lichtman, J.W. (2007). Transgenic strategies for combinatorial expression of fluorescent proteins in the nervous system. *Nature* 450, 56–62.
- Lloyd, D.R., Holmes, P., Jackson, L.P., Emery, A.N., and Al-Rubeai, M. (2000). Relationship between cell size, cell cycle and specific recombinant protein productivity. *Cytotechnology* 34, 59–70.
- Loulier, K., Barry, R., Mahou, P., Le Franc, Y., Supatto, W., Matho, K.S., Ieng, S., Fouquet, S., Dupin, E., Benosman, R., and Chédotal, A. (2014). Multiplex cell and lineage tracking with combinatorial labels. *Neuron* 81, 505–520.
- Lundy, S.D., Zhu, W.Z., Regnier, M., and Laflamme, M.A. (2013). Structural and functional maturation of cardiomyocytes derived from human pluripotent stem cells. *Stem Cells Dev.* 22, 1991–2002.
- Maldonado, M., Luu, R.J., Ramos, M.E., and Nam, J. (2016). ROCK inhibitor primes human induced pluripotent stem cells to selectively differentiate towards mesendodermal lineage via epithelial-mesenchymal transition-like modulation. *Stem Cell Res.* 17, 222–227.
- Mallanna, S.K., and Duncan, S.A. (2013). Differentiation of hepatocytes from pluripotent stem cells. *Curr. Protoc. Stem Cell Biol.* 26, 1G.4.1–1G.4.13.
- Mariani, J., Simonini, M.V., Palejev, D., Tomasini, L., Coppola, G., Szekely, A.M., Horvath, T.L., and Vaccarino, F.M. (2012). Modeling human cortical development in vitro using induced pluripotent stem cells. *Proc. Natl. Acad. Sci. U S A* 109, 12770–12775.
- Megyola, C.M., Gao, Y., Teixeira, A.M., Cheng, J., Heydari, K., Cheng, E.C., Nottoli, T., Krause, D.S., Lu, J., and Guo, S. (2013). Dynamic migration and cell-cell interactions of early reprogramming revealed by high-resolution time-lapse imaging. *Stem Cells* 31, 895–905.
- Meseguer, M., Herrero, J., Tejera, A., Hilligsøe, K.M., Ramsing, N.B., and Remohí, J. (2011). The use of morphokinetics as a predictor of embryo implantation. *Hum. Reprod.* 26, 2658–2671.
- Miyaoka, Y., Ebato, K., Kato, H., Arakawa, S., Shimizu, S., and Miyajima, A. (2012). Hypertrophy and unconventional cell division of hepatocytes underlie liver regeneration. *Curr. Biol.* 22, 1166–1175.
- Moreno, N., and González, A. (2017). Pattern of neurogenesis and identification of neuronal progenitor subtypes during pallial development in *Xenopus laevis*. *Front. Neuroanat.* 11. <https://doi.org/10.3389/FNANA.2017.00024>.
- Nakanishi, M., et al. (2019). Human pluripotency is initiated and preserved by a unique subset of founder cells. *Cell* 177, 910–924.e22.
- Nestorowa, S., Hamey, F.K., Pijuan Sala, B., Diamanti, E., Shepherd, M., Laurenti, E., Wilson, N.K., Kent, D.G., and Göttgens, B. (2016). A single-cell resolution map of mouse hematopoietic stem and progenitor cell differentiation. *Blood* 128, e20–31.
- Nilius, B., Voets, T., Prenen, J., Barth, H., Aktories, K., Kaibuchi, K., Droogmans, G., and Eggermont, J. (1999). Role of Rho and Rho kinase in the activation of volume-regulated anion channels in bovine endothelial cells. *J. Physiol.* 516 (Pt 1), 67–74.
- O’Farrell, P.H., Stumpff, J., and Tin Su, T. (2004). Embryonic cleavage cycles: how is a mouse like a fly? *Curr. Biol.* 14, R35–R45.
- Orford, K.W., and Scadden, D.T. (2008). Deconstructing stem cell self-renewal: genetic insights into cell-cycle regulation. *Nat. Rev. Genet.* 9, 115–128.
- Paşca, A.M., Park, J.Y., Shin, H.W., Qi, Q., Revah, O., Krasnoff, R., O’Hara, R., Willsey, A.J., Palmer, T.D., and Paşca, S.P. (2019). Human 3D cellular model of hypoxic brain injury of prematurity. *Nat. Med.* <https://doi.org/10.1038/s41591-019-0436-0>.
- Pauklin, S., and Vallier, L. (2013). The cell-cycle state of stem cells determines cell fate propensity. *Cell* 155, 135–147.
- Peerani, R., Rao, B.M., Bauwens, C., Yin, T., Wood, G.A., Nagy, A., Kumacheva, E., and Zandstra, P.W. (2007). Niche-mediated control of human embryonic stem cell self-renewal and differentiation. *EMBO J.* 26, 4744–4755.
- Rosowski, K.A., Mertz, A.F., Norcross, S., Dufresne, E.R., and Horsley, V. (2015). Edges of human embryonic stem cell colonies display distinct mechanical properties and differentiation potential. *Sci. Rep.* 5, 14218.
- Rowe, R.G., and Daley, G.Q. (2019). Induced pluripotent stem cells in disease modelling and drug discovery. *Nat. Rev. Genet.* 20, 377–388.
- Schmidt-Supprian, M., and Rajewsky, K. (2007). Vagaries of conditional gene targeting. *Nat. Immunol.* 8, 665–668.
- Sela, Y., Molotski, N., Golan, S., Itskovitz-Eldor, J., and Soen, Y. (2012). Human embryonic stem cells exhibit increased propensity to differentiate during the G1 phase prior to phosphorylation of retinoblastoma protein. *Stem Cells* 30, 1097–1108. <https://doi.org/10.1002/stem.1078>.
- Shcherbo, D., Murphy, C.S., Ermakova, G.V., Solovieva, E.A., Chepurnykh, T.V., Shcheglov, A.S., Verkhusha, V.V., Pletnev, V.Z., Hazelwood, K.L., and Roche, P.M. (2009). Far-red fluorescent tags for protein imaging in living tissues. *Biochem. J.* 418, 567–574.
- Snippert, H.J., Van Der Flier, L.G., Sato, T., Van Es, J.H., Van Den Born, M., Kroon-Veenboer, C., Barker, N., Klein, A.M., Van Rheenen, J., Simons, B.D., and Clevers, H. (2010). Intestinal crypt



- homeostasis results from neutral competition between symmetrically dividing Lgr5 stem cells. *Cell* *143*, 134–144.
- Trindade, F., Leite-Moreira, A., Ferreira-Martins, J., Ferreira, R., Falcão-Pires, I., and Vitorino, R. (2017). Towards the standardization of stem cell therapy studies for ischemic heart diseases: bridging the gap between animal models and the clinical setting. *Int. J. Cardiol.* *228*, 465–480.
- Warmflash, A., Sorre, B., Etoc, F., Siggia, E.D., and Brivanlou, A.H. (2014). A method to recapitulate early embryonic spatial patterning in human embryonic stem cells. *Nat. Methods* *11*, 847–854.
- Wong, C.C., Loewke, K.E., Bossert, N.L., Behr, B., De Jonge, C.J., Baer, T.M., and Pera, R.A. (2010). Non-invasive imaging of human embryos before embryonic genome activation predicts development to the blastocyst stage. *Nat. Biotechnol.* *28*, 1115–1121.
- Yamaguchi, Y., Shinotsuka, N., Nonomura, K., Takemoto, K., Kuida, K., Yosida, H., and Miura, M. (2011). Live imaging of apoptosis in a novel transgenic mouse highlights its role in neural tube closure. *J. Cell Biol.* *195*, 1047–1060.
- Yiangou, L., Grandy, R.A., Morell, C.M., Tomaz, R.A., Osnato, A., Kadiwala, J., Muraro, D., Garcia-Bernardo, J., Nakanoh, S., Bernard, W.G., et al. (2019). Method to synchronize cell cycle of human pluripotent stem cells without affecting their fundamental characteristics. *Stem Cell Reports* *12*, 165–179.
- Yoney, A., Etoc, F., Ruzo, A., Carroll, T., Metzger, J.J., Martyn, I., Li, S., Kirst, C., Siggia, E.D., and Brivanlou, A.H. (2018). WNT signaling memory is required for ACTIVIN to function as a morphogen in human gastruloids. *eLife* <https://doi.org/10.7554/eLife.38279>.
- Zangle, T.A., Chun, J., Zhang, J., Reed, J., and Teitell, M.A. (2013). Quantification of biomass and cell motion in human pluripotent stem cell colonies. *Biophys. J.* *105*, 593–601.
- Zhang, E., Li, X., Zhang, S., Chen, L., and Zheng, X. (2005). Ditr. *Biochem. Biophys. Res. Commun.* *333*, 1171–1177.



**Stem Cell Reports, Volume 15**

**Supplemental Information**

**A Rainbow Reporter Tracks Single Cells and Reveals Heterogeneous Cellular Dynamics among Pluripotent Stem Cells and Their Differentiated Derivatives**

**Danny El-Nachef, Kevin Shi, Kevin M. Beussman, Refugio Martinez, Mary C. Regier, Guy W. Everett, Charles E. Murry, Kelly R. Stevens, Jessica E. Young, Nathan J. Sniadecki, and Jennifer Davis**

**Figure S1**

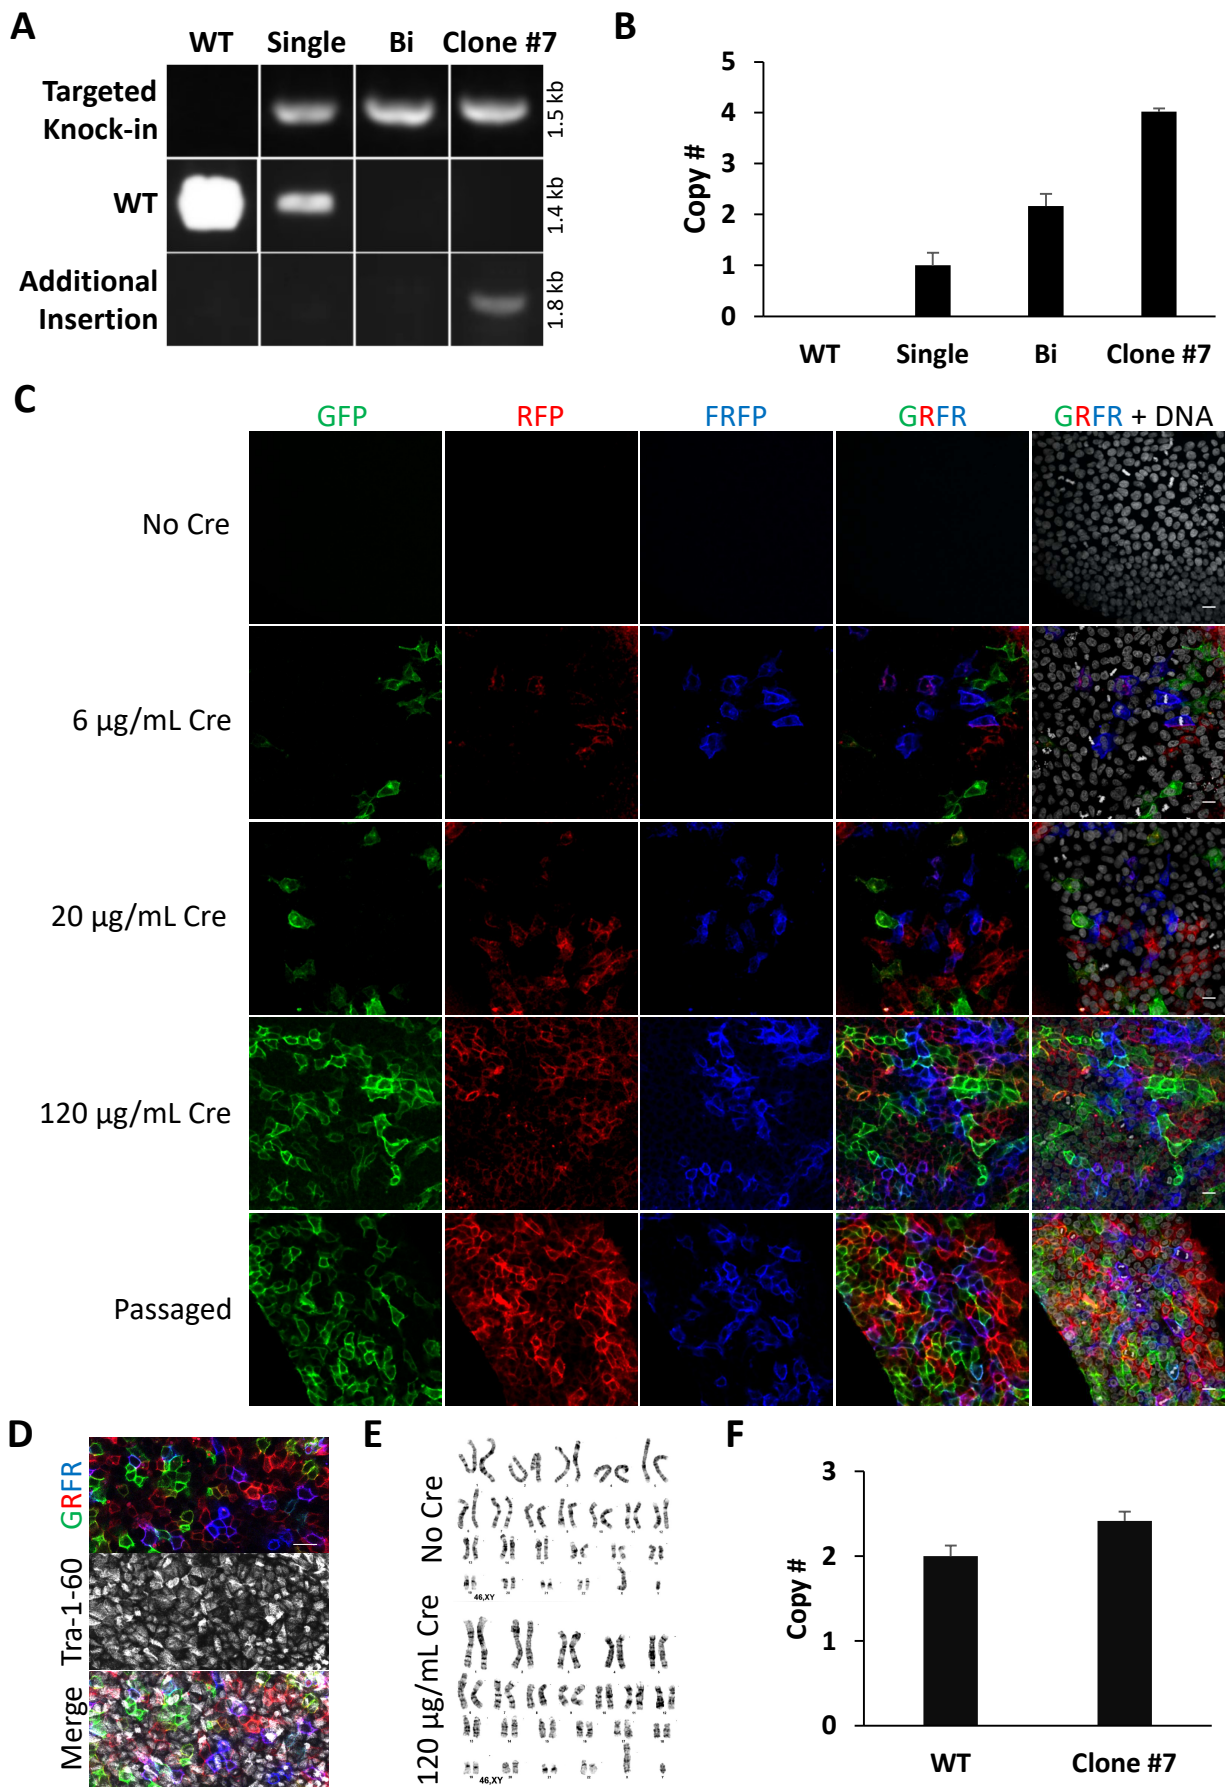

Figure S2

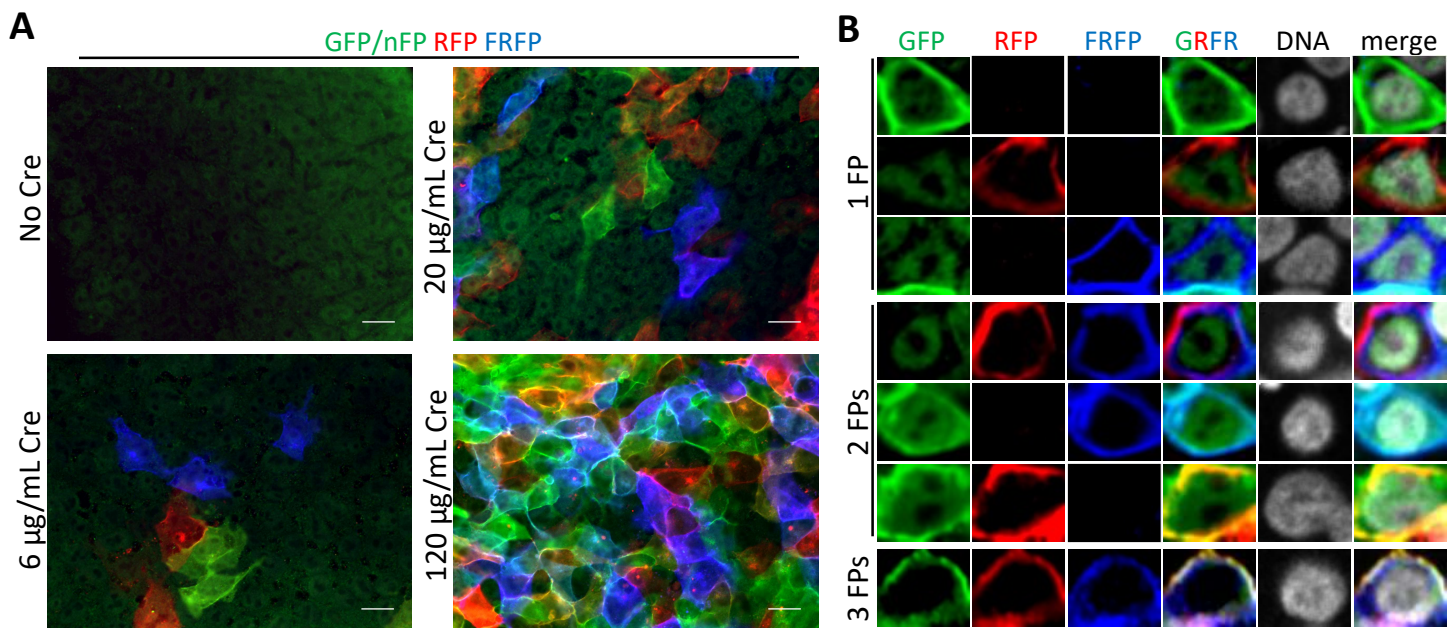

**Figure S3**

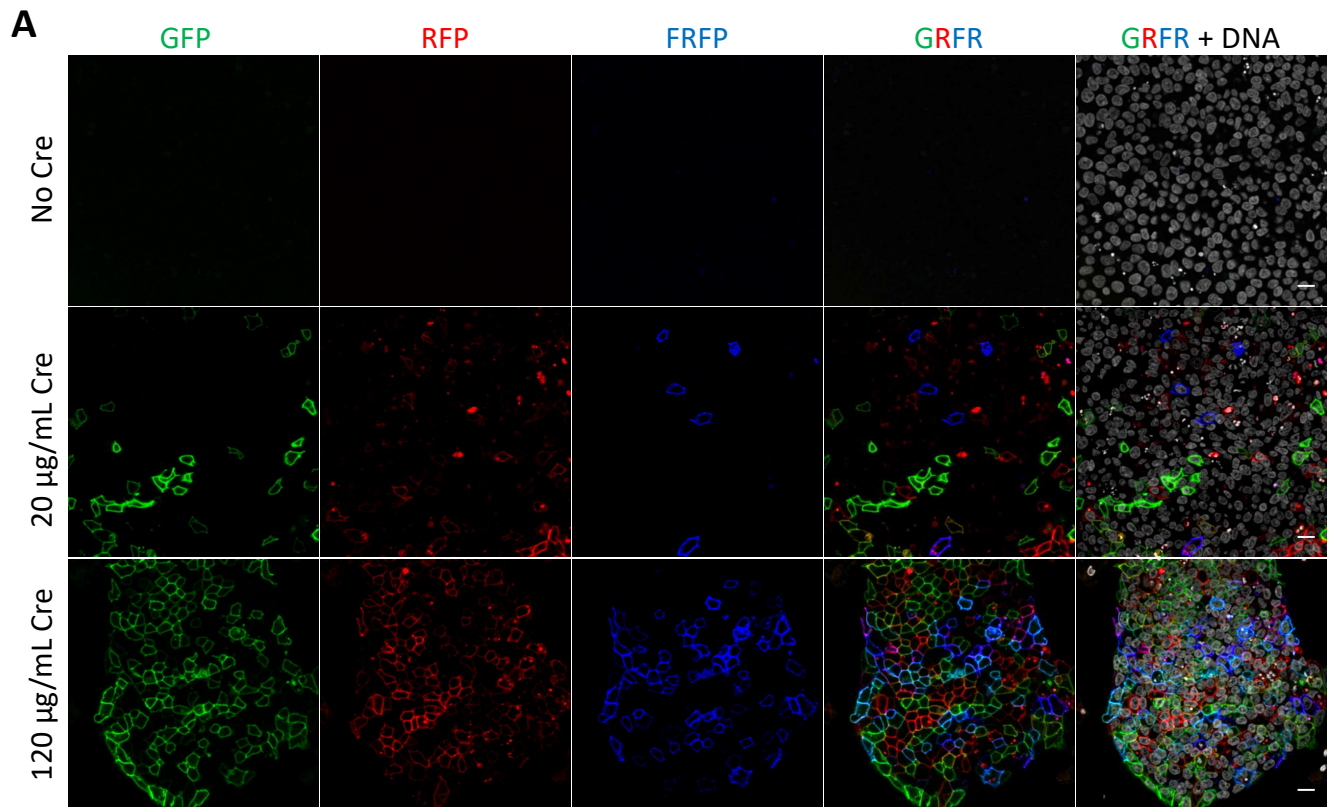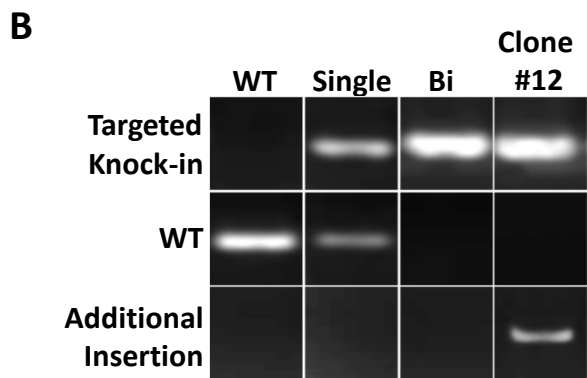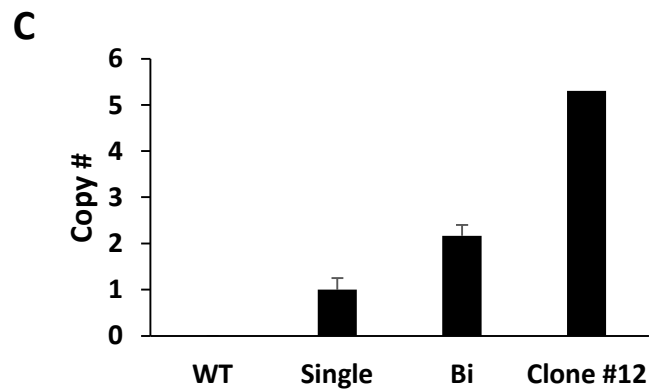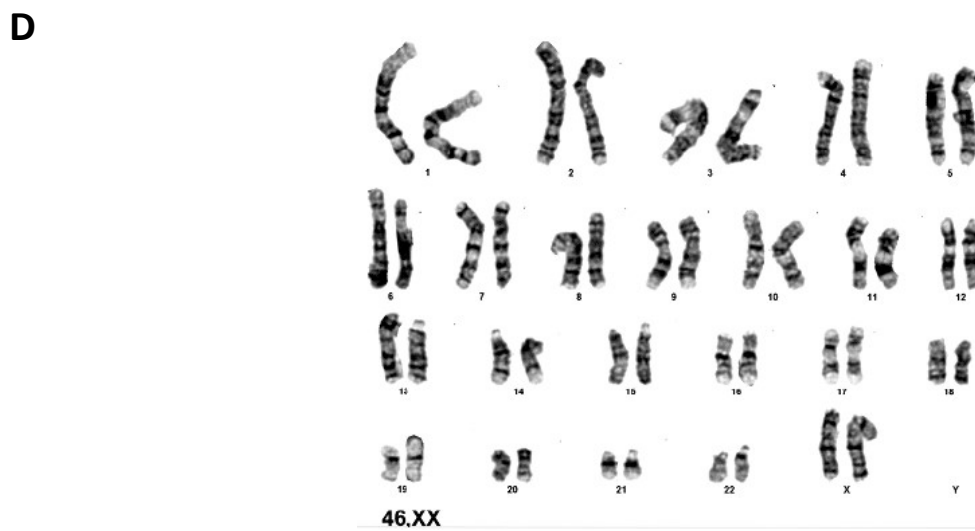

**Figure S4**

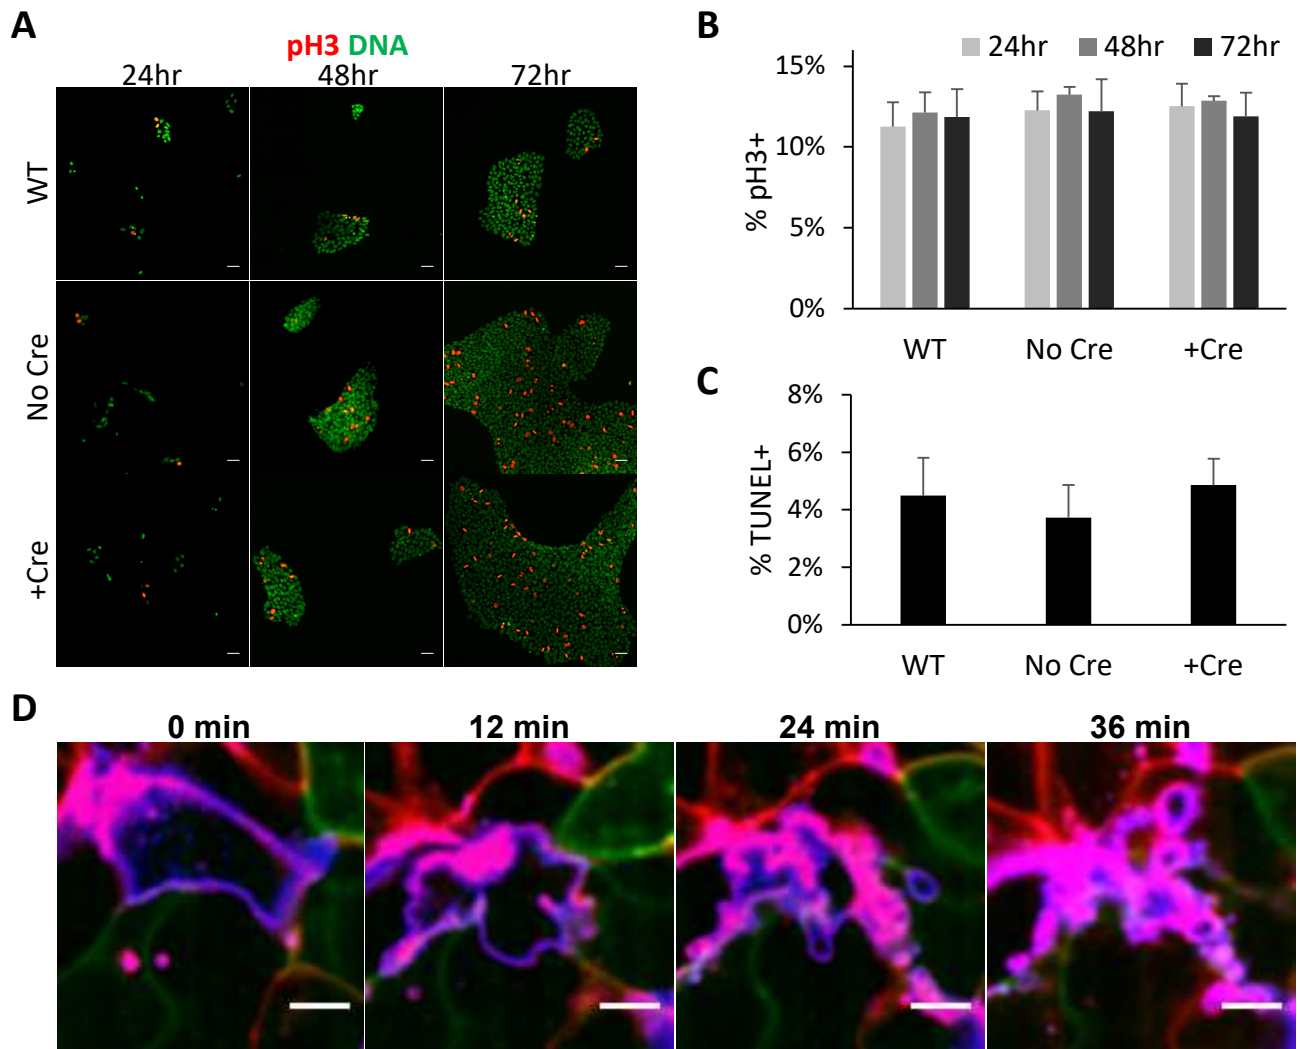

**Figure S5**

**A**

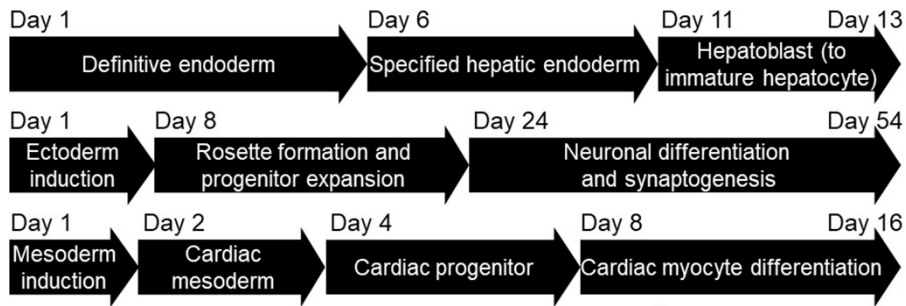

**B**

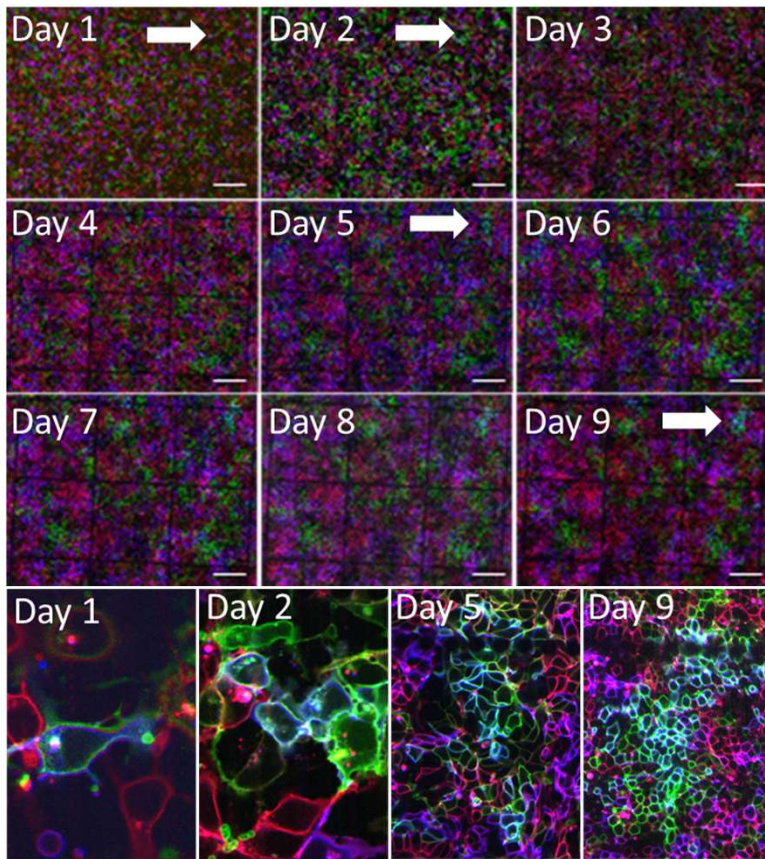

**C**

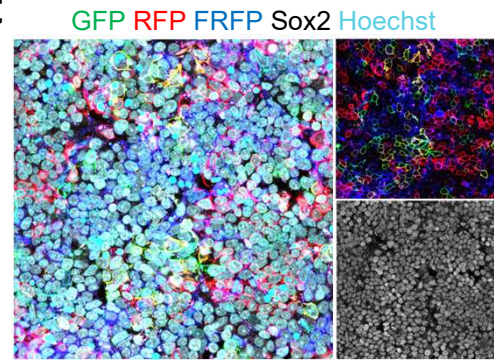

**D**

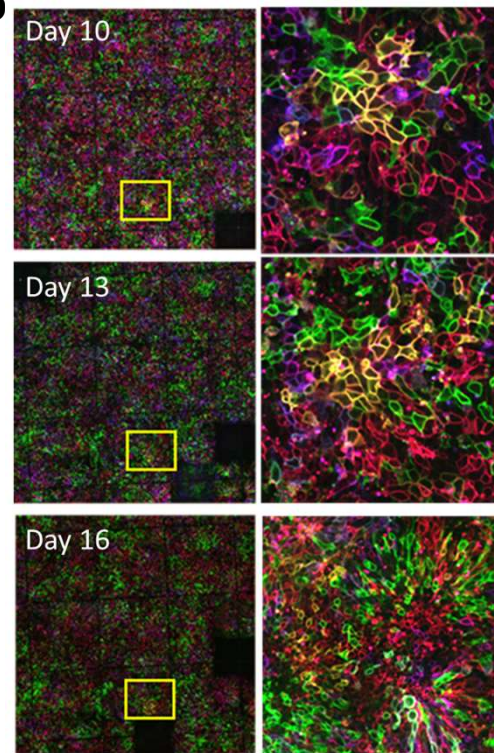

**E**

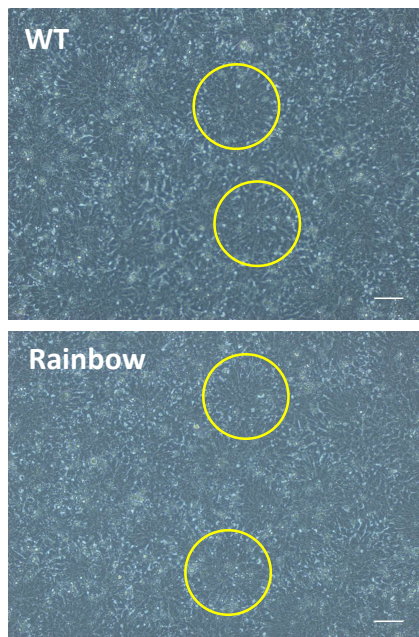

**F**

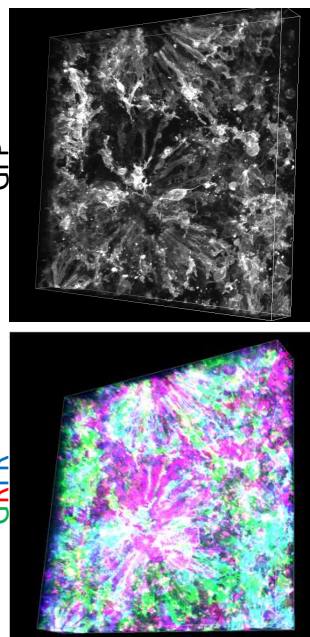

**G**

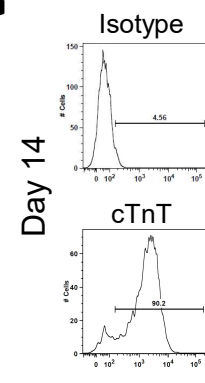

**H**

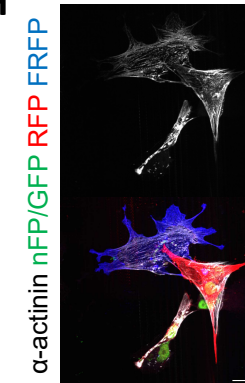

Figure S6

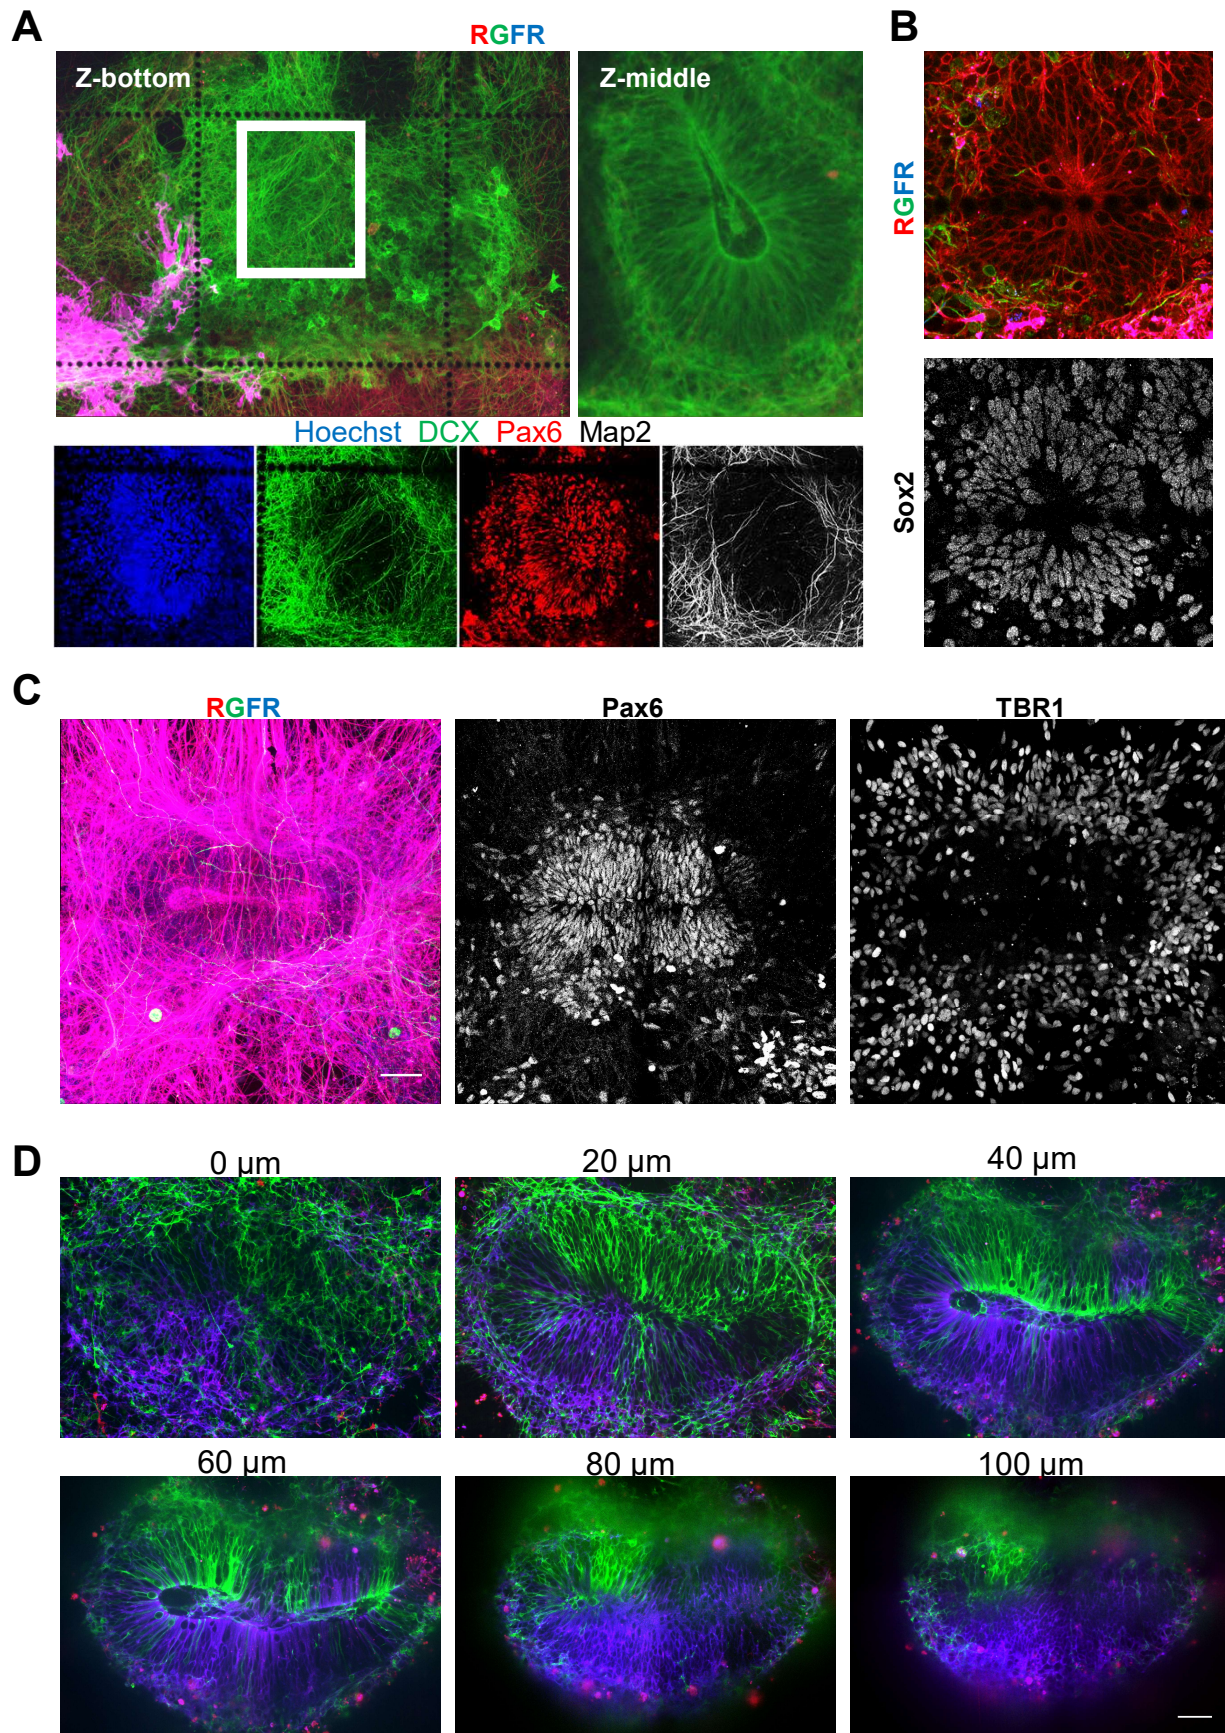

## **Supplemental Files**

**Videos 1-3, related to Figures 2, 4A, 4E, and 4F. Videos of 24 hour time-lapses of rainbow hiPSC cultures.**

**Video 4, related to Figures 2, 4A, 4E, and 4F. Video of 24-hour time lapse with cell traces.**

**Video 5, related to Figures 4C and 4D. Z-stack of hiPSCs showing height of cells at 4 days post plating, 0.4micron z-steps.**

**Video 6, related to Figure 5C. Rainbow cardiac myocytes beat in monolayer culture.**

**Video 7, related to Figure 6C and 6D. Optical sections and 3D reconstruction of clonal cortical structures, with DCX and Map2 staining shown in grayscale.**

**Supplemental File 1, related to Figure 1D. MATLAB code for spectral analysis.**

**Supplemental File 2, related to Figure 4E-4J. MATLAB code for migration analysis.**



## Supplemental Figure Legends

### Figure S1, related to Figure 1. Authentication of rainbow hiPSC model.

(A) Confirmation of genotype showing presence or absence of WT allele, targeted knock-in allele, and additional incorporations in control and various rainbow-targeted clonal lines. (B) Copy number analysis of the number of cassettes in rainbow-targeted clonal lines. (C) Expanded view of Figure 1C showing individual channels and nuclei. Bar=20  $\mu\text{m}$ . (D) Confirmation of the Tra-1-60 expression in rainbow hiPSCs. Bar=20  $\mu\text{m}$ . (E) Karyotype analysis of Rainbow hiPSC cell before and after high dose treatment of Cre showing normal male karyotype. (F) Copy number variation qPCR analysis for the BCL2L1 (20q11.21) locus in rainbow hiPSCs and isogenic controls.

### Figure S2, related to Figure 1. Visualization of spectral diversity and identification of unrecombined rainbow cassettes using immunostaining and conventional epifluorescence microscopy.

(A) Widefield images of rainbow hiPSCs that were treated with various doses of Cre, immunostained, and imaged using conventional excitation/emission filter cubes. Note the GFP antibody recognizes both the fluorescent-membrane-localized eGFP as well as the nuclear-localized-non-fluorescent GFP mutant (nFP). Bar=20  $\mu\text{m}$ . (B) Examples of hiPSCs expressing varying amounts and combinations of FPs after being treated with 120  $\mu\text{g}/\text{mL}$  Cre and immunostained, including triple positive cells that lack nuclear localized nFP, indicating all rainbow cassettes were recombined. Each tile represents an area of 17.55 $\mu\text{m}$  x 14.62 $\mu\text{m}$ .

### Figure S3, related to Figure 1. Authentication of rainbow hESC model.

(A) Representative confocal images of rainbow RUES2 human embryonic stem cells (hESCs) that were treated with various doses of Cre and imaged using white light laser and spectral detector settings that prevented spectral bleedthrough of the fluorescent proteins. Bar=20  $\mu\text{m}$ . (B) Confirmation of genotype showing presence or absence of WT allele, targeted knock-in allele, and additional incorporations in control and rainbow-targeted clonal lines. (C) Copy number analysis of the number of cassettes in rainbow-targeted clonal lines. (D) Karyotype analysis of rainbow hESCs showing normal female karyotype.

### Figure S4, related to Figure 2. Rainbow reporter does not affect hiPSC proliferation or apoptosis

(A) Immunostaining of phosphorylated-serine-10 of histone H3 (pH3, red) and Hoechst stain (green) at various timepoints post plating in wildtype isogenic control and transgenic hiPSCs with and without 120 $\mu\text{g}/\text{mL}$  Cre treatment. Bar=40  $\mu\text{m}$ . (B) Quantification of pH3+ nuclei from panel A. (C) Quantification of TUNEL flow cytometry of samples harvested 72 hours after initial plating. (D) Example of apoptotic cell from time-lapse live cell imaging, bar=10  $\mu\text{m}$ .

### Figure S5, related to Figure 5. Differentiation of rainbow labeled hiPSCs.

(A) Timecourses for hepatoblast, cortical neuron, and cardiac myocyte differentiations. (B) Repeat imaging of NPC differentiation (Days 1-9), bar=200  $\mu\text{m}$ , white arrows point to a clonally expanding cell shown in insets below. (C) Confirmation of NPC generation by Sox2 immunostaining. (D) Time course from NPC to neural rosette formation with example of clonally expanding and dispersing clone in the insets. (E) Brightfield image of isogenic wildtype control and rainbow-labeled rosettes, bar=200  $\mu\text{m}$ . (F) 3D reconstruction (48  $\mu\text{m}$  depth) of rosette structure showing combined rainbow fluorescence and a single channel. (G) Flow cytometry analysis of Day 14 cardiac myocytes using antibody against cardiac Troponin T or isotype control. (H) Unlabeled rainbow hiPSCs were differentiated to CMs, recombinant Cre was added on day 14, and cells were fixed and immunostained on day 24, bar=40  $\mu\text{m}$ .

**Figure S6, related to Figure 6. Self-assembled 3D cortical structures are derived from clonally dominant progenitors.** (A) Rainbow signal showing clonally dominant NPC, viewed at the culture substrate (Z-bottom). The boxed region is shown at higher magnification at a Z-slice midway through the Z-stack (Z-middle). Panels below show maximum intensity projections of the same region after staining for several markers. (B) Confirmation of NPC marker expression in VZs. (A-B) Each coordinate grid represents a 500 x 500  $\mu\text{m}$  square and each dot has a 10  $\mu\text{m}$  diameter. (C) Maximum intensity projections of the rainbow signal and NPC and terminally differentiated cortical neuron markers, bar=50  $\mu\text{m}$ . (D) Example of mixed VZ derived from multiple NPCs, showing Z-slices at 20  $\mu\text{m}$  intervals, with 0  $\mu\text{m}$  being at the culture substrate, bar=50  $\mu\text{m}$ .

## Supplemental Experimental Procedures

**Generation of human PSC lines:** We redesigned the brainbow3.2 construct (Addgene 45179), replacing the neuron-specific Thy1 promoter with a constitutive CAG promoter that is insensitive to cell-type and differentiation status (Gantz *et al.*, 2012; Ocegüera-Yanez *et al.*, 2016). This construct was flanked with AAVS1 homology arms (Addgene 80490) to facilitate targeted knock-in using Gateway cloning (BP clonase Thermo Fisher 11789020 and LR clonase Thermo Fisher 11791020). We co-electroporated WTC11 hiPSCs and RUES2 embryonic stem cells with the resulting CAG-brainbow3.2 (Rainbow reporter) with AAVS1 homology arms construct and a plasmid expressing Cas9 and a guide RNA targeting the AAVS1 locus (Addgene 80494) using Amaxa Human Stem Cell Nucleofector (Lonza).

**Characterization of rainbow PSC lines and validation of transgene:** For generation of clonal cell lines and clonogenic analysis, single cell suspensions were plated at a density of 75 cells / cm<sup>2</sup>, expanded, and screened by PCR (genotype) and qPCR (copy number). We isolated genomic DNA (Qiagen 69506) for PCRs spanning the construct to confirm by Sanger sequencing (Eurofins). PCRs were performed using PrimeStar GXL polymerase (Takara R050A) with all primers run at 250nM concentration with a 55°C annealing step and thermocycling as recommended by the manufacturer. qPCRs were performed using an ABI 7900HT machine and SYBR Green (BioRad 1725121) with all primers run at 300nM concentration with a 60°C annealing step and thermocycling as recommended by the manufacturer.

**Genotyping primers:** Knockin allele 5' end: F- TCGACTTCCCCTCTTCCGATG, R- GAGCCTAGGGCCGGGATTCTC (1.2kb); knockin allele 3' end: F- GATGCCCGGCGTCTACTATG, R- CTCAGGTTCTGGGAGAGGGTAG (1.5kb); WT allele: F- TCGACTTCCCCTCTTCCGATG, R- CTCAGGTTCTGGGAGAGGGTAG (1.4kb); other insertions: F- GATGCCCGGCGTCTACTATG, R- GACCCAATATCAGGAGACTAGG (1.8kb) (other/additional insertions primers detect plasmid backbone and thus random insertion with the integration into the genome not mediated by homologous recombination where sequence outside of the homology arms get incorporated) (Ikeda *et al.*, 2018).

**Copy # qPCR primers:** Rainbow copy #: F- TTGACCTCGGAGGTGTAGTG, R- GACGGCGAGTTCATCTACAAG (191bp); internal control (HOXA7 genomic locus): F- CCGGCTCTTACGGCTACAAT, R- CCAAAGTGGCTGGAGGAGG (76bp); BCL2L1 (20q11.21) copy # (Baker *et al.*, 2016): F-TCTGCAGAAGGCTACCCCTA, R- TGCTGTGTCTAAGACCTCTTTCAT.

**Sequencing primers** (we generated PCR products from genomic DNA template using primer pairs that spanned the rainbow construct and subsequently sequenced with the same primers): Primer pair 1: F- TCGACCGCCTTGATTCTCATGG, R- AGGACGACGGCAACTACAAGAC; primer pair 2: F- AGCAGGACCATGTGATCG, R- GACTACACCATCGTGGAACAG; primer pair 3: F- TGGGTCTAGATGCATTCG, R-GCCTCATCTACAACGTCAAG; primer pair 4: F- TGCTAGGGAGGTCGCAGTATC, R- CACATGGTCCTGCTGGAGTTC.

The number of unique hues was determined by copy number analysis demonstrating a total of four copies of the Brainbow cassette. With three possible fluorescent proteins that can be expressed from each cassette, the number of unique possible outcomes can be described by the trinomial theorem,  $[(n+2)(n+1)]/2$ , where  $n$  = the number of copies of the cassette. To account for the possibility that a cell can undergo 1, 2, 3, or 4 recombination events this equation was solved for  $n=1$ ,  $n=2$ ,  $n=3$ , and  $n=4$ , and summed, indicating 34 unique recombination outcomes. However, twelve of the unique combinations result in duplicated colors that vary only by intensity (i.e. one copy of red versus four copies of red result in the same hue, though with a different signal intensity) and another four unique outcomes result in duplicated hues that vary only by tint (i.e. one copy of red versus one copy of green and one copy of blue with two copies of red results in the same red hue, though with a different tint of white). Thus, there are eighteen unique hues that can be represented on a color wheel. The primary colors were most represented, presumably due to the likelihood of only one Brainbow copy undergoing Cre-lox recombination and the greater proportion of recombination outcomes resulting in primary color expression.

**Cell line karyotyping:** Karyotyping analysis was performed on hiPSC and hESC lines by certified a cytologist Diagnostic Cytogenetics, Inc. (Seattle, WA) that indicated normal karyotypes.

**Imaging:** Images collected on a Leica SP8 confocal microscope used the following white light laser and spectral detector settings (excitation laser nm, emission spectral detector range nm-nm): AF 405 secondary/Hoechst (405, 410-500), eGFP (498, 504-540), mOrange2 (543, 558-584), mKate2 (590, 597-640). Antibody stains using conventional fluorescent secondary antibodies (AF405, AF 498, AF 555, AF 647) were imaged on a Nikon TiE widefield with standard DAPI, FITC, TRITC, and Cy5 filter cubes. Live imaging (24-hour time-lapses and long-term daily-imaging experiments) on a Nikon TiE equipped with Yokogawa W1 spinning disk confocal system and high sensitivity EMCCD camera was performed with the following settings (excitation fixed-LED laser nm, emission filter): eGFP (488, GFP), mOrange2 (561, TRITC), mKate2 (561, Cy5). For cell cycle kinetics 121 images were collected with 12 minutes between frames for each 24-hour experiment. For long-term daily live imaging experiments, we used culture slides that had gridded coordinate systems (Ibidi 80826-G500) to ensure re-imaging of the same cells/progeny of same ancestors, or 24 well plates that were physically marked with reference points (Ibidi 82406).

**Spectral analysis:** Images collected on a Leica SP8 confocal microscope with the described white light laser and spectral detector were analyzed on a per pixel basis and binned by the eighteen possible hues determine by genotype analysis using a custom generated MATLAB code (Supplemental File 1).

**Migration analysis:** Individual cells or cell colonies were manually traced, and the centroid positions relative to a fixed reference point were determine using ImageJ's "measure" function. The absolute positions or relative positions (where time 0 was set to X,Y coordinate 0,0) and migration were analyzed over time using custom MATLAB codes (Supplemental File 2). To quantify distances to the nearest colony edge, the distances from the most proximal cell membrane to the nearest colony edge was manually traced.

**Staining:** Samples were fixed with 4% PFA, permeabilized/blocked in 5% goat serum in PBS supplement with 0.1% TritonX-100, and stained with antibodies against: Oct4 (Abcam ab19857, 1:500), Tra-1-60 (Millipore MAB4360, 1:500), cTnT (ThermoFisher MA5-12960, 1:200),  $\alpha$ -actinin (Sigma A7811, 1:400), GFP (Kerafast EMU101, 1:1000), mCherry (recognizes mOrange2, Kerafast EMU105, 1:1000), TagRFP (recognizes mKate2, EMU107, 1:1000) phosphorylated-H3 (pH3, Abcam ab5176, 1:400), Ki67 (BD Pharmigen 558615, 1:400), Sox2 (Cell Signaling D6D9, 1:500), Pax6 (DSHB, 1:50), TBR1 (Abcam ab31940, 1:500), DCX (Abcam ab18723, 1:500), Map2 (Abcam ab92434, 1:1000), Ctip2 (Abcam ab18465, 1:500), AFP (Agilent/Dako A000829, 1:500), HNF4a (Abcam ab55223, 1:500). TUNEL (Roche 12156792910) and Hoechst 33342 (Life Technologies H3570) stains were performed according to manufacturers' guidelines.

**Flow Cytometry:** Cells were detached using 0.05% Trypsin (Gibco 25300-054), followed by Trypsin inhibition with 10% fetal bovine serum (FBS), and fixed with 4% PFA. The staining methods and reagents described above were used, modified for in suspension staining with cells centrifuged at 300g between each step. A Canto flow cytometer (BD Biosciences) was used and resulting data was analyzed following previously described procedures (Gerbin *et al.*, 2015).

**Neural Differentiation:** Neural differentiation of iPSCs into cortical excitatory neurons was carried out using established protocols with slight modifications (Mariani *et al.*, 2012; Rose *et al.*, 2018). A Basal Neural Maintenance Media [BNMM: 250mL DMEM/F12 + Glutamine (Gibco 11320-033), 250mL Neurobasal (Gibco 2110-049), 2.5mL N2 Supplement (Gibco 17502-048), 5mL B27 Supplement (Gibco 17504-044), 2.5mL GultaMax (Gibco 35050-061), 2.5mL ITS-A (Gibco 51300-044), 400uL BME (Thermo Fisher 21985023), and 2.5mL NEAA (Thermo Fisher 11140050)] was used throughout the protocol and supplemented with specific factors at the different stages of differentiation. iPSCs were dissociated with Accutase (Thermo Fisher Scientific # 00-455-56) for 4 minutes at 37°C, washed 1 time with iPSC media and seeded onto Matrigel-coated 6-well plates at a density of 3M per well in iPSC media supplemented with 10uM Y-27632 ROCK Inhibitor (Ascent Scientific #ASC-129) overnight. The next day, neural induction was initiated using Neural Induction Media (NIM), by supplementing BNMM with 10uM SB431542 (Biogems #BG6675SKU301) and 0.5uM LDN 193189 (Biogems #BG5537SKU106). NIM was changed daily for 8 days. On day 8, cells were washed once with PBS, then treated with 1ml of warm Versene (Gibco #15040066) for 4 minutes at 37°C. The Versene was aspirated off, then 3ml of NIM were added to the cells. A cell scraper was used to carefully scrape the cells off and a 5ml serological pipette was used to gently triturate the cells into small clumps. The cell clumps were transferred into new Matrigel-coated wells at a 1:3 split and incubated overnight in NIM plus 10uM Y-27632 ROCK inhibitor. The next day (day 9), the media was changed to BNMM and refreshed daily until well-

defined neural rosettes were observed. At that point, Neural Stem Cell Media (NSCM) was fed to the cells and was made by supplementing BNMM with 10ug/ml FGF (R&D #233-FB/CF) and continued to day 16. On day 16, the cells were dissociated with Accutase, washed 1 time with BNMM and re-plated at a 1:3 split onto new Matrigel-coated wells in NSCM plus 10 $\mu$ M Y-27632 overnight. NSCM was refreshed daily up to day 23. On day 23, the cells were dissociated with Accutase, washed 1 time with BNMM and re-plated onto Matrigel-coated 10cm plates at a density of 4 million per 10cm plate or 125K cells per well of a 24-well plate in NSCM plus 10 $\mu$ M Y-27632 overnight. Neural differentiation into cortical neurons was initiated the next day by switching to ND+++ media, BNMM with 10ug/ml BDNF (PeproTech # 450-10), 10ug/ml GDNF (PeproTech # 450-02) and 250ug/ml dbcAMP (Sigma #D0627-1G). Half media changes were done every other day up to day 54, or longer, at which point the cells were fixed for ICC.

Cardiac Myocyte Differentiation: We used a previously established small molecule directed differentiation protocol with slight modification (Burridge *et al.*, 2014). Briefly, hiPSCs were seeded on Matrigel coated vessels (350,000 per well of 6-well plate or 100,000 per well of 24-well plate) in mTeSR media supplemented with 10 $\mu$ M Y-27632. 24 hours later media was changed to mTeSR media supplemented with 1 $\mu$ M Chiron 99021 (Cayman Chemicals). After 24 hours media was changed to RPMI (Gibco) supplemented with B27 supplement minus insulin (Thermo Fisher) and 5 $\mu$ M Chiron 99021. After 48 hours media was changed to RPMI supplemented with B27 supplement minus insulin and 2 $\mu$ M Wnt inhibitor Wnt-C59 (Selleckchem). After 48 hours media was changed to RPMI supplemented with B27 supplement plus insulin (cardios media), with recurring media changes every 2-3 days until endpoint. Single cell suspensions for analysis, replating and cardiac injections were generated by incubating the culture with a 1:1 mixture of 0.25% Trypsin and Versene for 7 minutes at 37C. Digestion was stopped with Stop Solution (cardios media + 10% FBS + 0.2 Kunitz units/ $\mu$ L DnaseI) and cells were replated in cardios media supplemented with 10 $\mu$ M Y-27632 and 5% FBS for the first 24 hours, then returned to standard Cardios media and replaced every 2-3 days.

Hepatic Differentiation: Rainbow labeled hiPSCs were differentiated to hepatic progenitors using previously published methods (Mallanna and Duncan, 2013). Briefly, hiPSCs were seeded at 400,000 cells/well in 24-well plate format in mTeSR1 containing 10 $\mu$ M Y-27632 and allowed to adhere overnight. The following morning (17 hr later) media was changed to mTeSR1 without Y-27632. Following an additional 8hr of culture in mTeSR1, media was changed to RPMI-1640 (RPMI, Gibco) containing 1X B-27 Supplement minus insulin (ThermoFisher), 0.5X non-essential amino acids (NEAA, ThermoFisher), 1X Penicillin/Streptomycin, 100ng/ml Activin A (R&D Systems), 10ng/ml BMP4 (R&D Systems), and 20ng/ml bFGF (Invitrogen) for two days with daily media changes (Differentiation days one and two). On day three media was changed to RPMI containing 1X B-27 Supplement minus insulin, 0.5X NEAA, 1X Penicillin/Streptomycin, and 100ng/ml Activin A for three days with daily media changes. Cells were cultured in a 5% CO<sub>2</sub>, 37°C incubator with ambient O<sub>2</sub> for days 0-5. On day six media was changed to RPMI containing 1X B-27 Supplement (containing insulin, ThermoFisher), 0.5X NEAA, 1X Penicillin/Streptomycin, 20ng/ml BMP4, and 10ng/ml bFGF for five days with daily media changes and cultures were moved from ambient O<sub>2</sub> to 4% O<sub>2</sub>, 5% CO<sub>2</sub>, 37°C for the remainder of the differentiation. On day 11 media was changed to RPMI containing 1X B-27 Supplement, 0.5X NEAA, 1X Penicillin/Streptomycin, and 20ng/ml HGF (Peprotech) for two days with daily media changes.

## Supplemental References

- Baker, D. *et al.* (2016) 'Detecting Genetic Mosaicism in Cultures of Human Pluripotent Stem Cells', *Stem Cell Reports*. Cell Press, 7(5), pp. 998–1012. doi: 10.1016/j.stemcr.2016.10.003.
- Burridge, P. W. *et al.* (2014) 'Chemically defined generation of human cardiomyocytes', *Nature Methods*. Nature Publishing Group, 11(8), pp. 855–860. doi: 10.1038/nmeth.2999.
- Gantz, J. A. *et al.* (2012) 'Targeted genomic integration of a selectable floxed dual fluorescence reporter in human embryonic stem cells.', *PLoS one*. 7(10), p. e46971. doi: 10.1371/journal.pone.0046971.
- Gerbin, K. A. *et al.* (2015) 'Enhanced Electrical Integration of Engineered Human Myocardium via Intramyocardial versus Epicardial Delivery in Infarcted Rat Hearts', *PLoS ONE*. Public Library of Science, 10(7), p. e0131446. doi: 10.1371/JOURNAL.PONE.0131446.
- Ikeda, K. *et al.* (2018) 'Efficient scarless genome editing in human pluripotent stem cells', *Nature Methods*. Nature Publishing Group, 15(12), pp. 1045–1047. doi: 10.1038/s41592-018-0212-y.
- Mallanna, S. K. and Duncan, S. A. (2013) 'Differentiation of Hepatocytes from Pluripotent Stem Cells', in *Current Protocols in Stem Cell Biology*. Hoboken, NJ, USA: John Wiley & Sons, Inc., p. 1G.4.1-1G.4.13. doi: 10.1002/9780470151808.sc01g04s26.
- Mariani, J. *et al.* (2012) 'Modeling human cortical development in vitro using induced pluripotent stem cells.', *Proceedings of the National Academy of Sciences of the United States of America*. National Academy of Sciences, 109(31), pp. 12770–5. doi: 10.1073/pnas.1202944109.
- Oceguera-Yanez, F. *et al.* (2016) 'Engineering the AAVS1 locus for consistent and scalable transgene expression in human iPSCs and their differentiated derivatives', *Methods*, 101, pp. 43–55. doi: 10.1016/j.ymeth.2015.12.012.
- Rose, S. E. *et al.* (2018) 'Leptomeninges-Derived Induced Pluripotent Stem Cells and Directly Converted Neurons From Autopsy Cases With Varying Neuropathologic Backgrounds.', *Journal of neuropathology and experimental neurology*. Oxford University Press, 77(5), pp. 353–360. doi: 10.1093/jnen/nly013.
